# Supplementary material for: Temporally restricted activation of IFNβ signaling determines response to immune checkpoint therapy
Source: Research Square preprint supplement (doi:10.21203/rs.3.rs-892399/v1), 2021-09-24
Supplement: Supplementary file 2 [file 4a6203d1bb7ef44321728f33.xlsx]

## Sheet: AB1 TCseq
gene	clustergroup	membership score
GM6166	1	0.657204
GM38162	1	0.65091
HIC2	1	0.650257
HEPACAM2	1	0.649734
GM6023	1	0.649321
GM9752	1	0.64866
GM7889	1	0.645809
GM5430	1	0.645543
GM38211	1	0.642935
HINT3	1	0.642671
GM37843	1	0.642412
GM38329	1	0.642402
GM9670	1	0.641682
GM6170	1	0.641063
GSTP1	1	0.640087
GM5738	1	0.63845
GM9385	1	0.637258
HAS3	1	0.637146
GM37447	1	0.635918
GM37692	1	0.635714
HEYL	1	0.633749
GM8979	1	0.633648
H2-T23	1	0.63301
GM37397	1	0.631844
HMGN2-PS1	1	0.631445
GZMK	1	0.630589
GM9712	1	0.630241
HCFC2	1	0.628752
GM9844	1	0.628539
GNB1L	1	0.627651
GM9905	1	0.626397
GM6028	1	0.625929
GM7478	1	0.625178
GM6877	1	0.624111
HACE1	1	0.622689
GM9429	1	0.62229
GPS1	1	0.6222
GM43362	1	0.622082
HOPXOS	1	0.622045
GM7887	1	0.621652
GM42547	1	0.619969
HEXIM1	1	0.619173
GM43511	1	0.618994
GNG4	1	0.618516
GM4673	1	0.618422
H3F3A-PS2	1	0.618177
GM43578	1	0.618082
GM32742	1	0.617619
GNA12	1	0.617568
GM37804	1	0.616547
GPC6	1	0.616376
GM9164	1	0.616339
GM9013	1	0.616154
GYPC	1	0.616036
GPR83	1	0.615982
GM43512	1	0.615662
GM3650	1	0.615469
GM8816	1	0.61511
GM5511	1	0.614973
HCK	1	0.614725
GM43197	1	0.614005
GM43039	1	0.613761
GM36448	1	0.61344
GM43667	1	0.612838
GSTCD	1	0.612743
GM6829	1	0.612611
GRAMD1A	1	0.612269
GM43545	1	0.611672
HNRNPU	1	0.611575
GM4430	1	0.611354
GM5228	1	0.61106
GM43890	1	0.611013
GM2991	1	0.610726
GM7291	1	0.610415
GPN2	1	0.610117
GM37975	1	0.609603
GM44199	1	0.609379
GM7598	1	0.608596
GPX1	1	0.608269
GM44524	1	0.608125
GM44751	1	0.607697
GM8146	1	0.607607
GM9920	1	0.607484
GM6177	1	0.607177
GM9311	1	0.606391
HDAC8	1	0.605673
GM37309	1	0.605554
GSE1	1	0.605552
HNRNPH3	1	0.6055
GOSR1	1	0.605412
GM6047	1	0.605397
GM3150	1	0.605387
GM7964	1	0.605018
GM31166	1	0.604942
GM7237	1	0.60481
HMGN5	1	0.604675
GM8918	1	0.604401
GM8276	1	0.604287
HERC6	1	0.603821
GM6382	1	0.603522
GM6758	1	0.603249
GREB1	1	0.603152
GPS2	1	0.603148
GM6578	1	0.602369
GM44280	1	0.602158
GM4974	1	0.601283
GM7860	1	0.601051
GM4342	1	0.600939
GPR55	1	0.600712
GRK4	1	0.600709
GM43196	1	0.600616
HNRNPUL1	1	0.600235
GM9892	1	0.600185
GM42855	1	0.600132
GM9353	1	0.599932
H6PD	1	0.599683
HMCN1	1	0.599369
HMGCR	1	0.599336
HAP1	1	0.599126
GM7658	1	0.598175
GRAMD1C	1	0.597714
GM5822	1	0.597572
GM36266	1	0.59755
GM42977	1	0.59744
GM3699	1	0.597262
HAVCR1	1	0.597106
GM8802	1	0.597106
GM42664	1	0.59705
GM42549	1	0.596899
HOMER3	1	0.596796
GM9320	1	0.596782
GM37090	1	0.596638
GM8000	1	0.596256
HOGA1	1	0.596081
GM44877	1	0.595937
GM45110	1	0.595801
GM38375	1	0.595499
HCST	1	0.595065
GM42937	1	0.595009
GM43172	1	0.594733
GNB5	1	0.594657
GM5552	1	0.594644
GM44706	1	0.594573
GM43375	1	0.59437
GM8801	1	0.594231
GM44243	1	0.593785
GSTP3	1	0.593499
GM34783	1	0.593208
GM43844	1	0.592581
HACD4	1	0.592082
GM45148	1	0.591731
GM44777	1	0.59111
GM7285	1	0.590779
GM42690	1	0.590466
GTF2H2	1	0.590395
GM9077	1	0.59038
GM34144	1	0.590348
H2-D1	1	0.590266
HEATR3	1	0.590253
GM38309	1	0.590143
GM8739	1	0.590117
GM9278	1	0.590074
GM3671	1	0.589702
GNPDA1	1	0.589603
GPR161	1	0.589468
GPAM	1	0.589281
GNMT	1	0.589264
GM8010	1	0.588893
GM43860	1	0.588787
GM6180	1	0.588503
GPR162	1	0.588498
GM6407	1	0.588418
GM6981	1	0.588346
GM42944	1	0.587318
GM6855	1	0.587048
GM8778	1	0.587047
GM8522	1	0.586873
GPSM3	1	0.586443
GPRC5C	1	0.586271
GM42918	1	0.586267
GM32536	1	0.586083
GM867	1	0.585978
GNL2	1	0.585843
GM5846	1	0.585713
GM43332	1	0.585606
GMDS	1	0.585546
HIP1	1	0.585218
GM9619	1	0.585006
GM44837	1	0.584957
HGF	1	0.584856
GM45151	1	0.584717
GM30074	1	0.584706
GM9506	1	0.584639
GM45501	1	0.584575
GM45286	1	0.58455
GM7733	1	0.584306
GPR173	1	0.584099
GNAI3	1	0.583982
GPR107	1	0.583946
GM43921	1	0.583907
GM37154	1	0.583888
GM9057	1	0.583865
GTF3C4	1	0.583809
GM37078	1	0.583757
GM5870	1	0.583672
GM44250	1	0.583502
GM42878	1	0.583418
GM37123	1	0.583345
GM7363	1	0.583012
GM8141	1	0.582896
GM7582	1	0.582707
GM38150	1	0.582438
GM6485	1	0.582407
GMFG	1	0.582254
GM4525	1	0.582101
GM37780	1	0.58186
GM43302	1	0.581595
HEXIM2	1	0.581535
GM44200	1	0.581465
GPSM1	1	0.581033
GM3852	1	0.581018
H2-Q4	1	0.580655
HADHA	1	0.580573
GSK3A	1	0.58045
GM43855	1	0.580386
GM44873	1	0.580078
HES1	1	0.580038
GM45605	1	0.579534
HINT1	1	0.579359
GM9200	1	0.578888
GM3912	1	0.578881
GM9755	1	0.578765
GM38345	1	0.578648
GM9364	1	0.578487
GM44878	1	0.578277
HMGB2	1	0.577986
GM5302	1	0.577882
GM9836	1	0.577294
HAUS2	1	0.576911
GM7536	1	0.576892
GM9577	1	0.576715
GM9523	1	0.576695
GM43437	1	0.576664
GM37711	1	0.576626
GM4270	1	0.576244
HCLS1	1	0.576187
GTF2IRD1	1	0.575988
GM9765	1	0.575927
GM4487	1	0.5759
GM42845	1	0.57557
GM53	1	0.575116
GPCPD1	1	0.575103
GPR174	1	0.575039
GM36401	1	0.574894
HELB	1	0.574863
GM37285	1	0.573482
GTF2E2	1	0.573466
GM42868	1	0.573465
GM43859	1	0.573457
HNRNPH1	1	0.573414
GM7666	1	0.573373
GSTP2	1	0.573359
GSN	1	0.57319
GPR1	1	0.573134
GM6756	1	0.573131
GTF3C2	1	0.572966
H2-M2	1	0.572895
GM6645	1	0.572244
GM4908	1	0.57161
GRIPAP1	1	0.571535
GM8991	1	0.571107
GRM6	1	0.571089
GM4017	1	0.570469
GM45133	1	0.570454
GM8189	1	0.569931
GM7329	1	0.569656
GM7571	1	0.569617
GM43714	1	0.569286
GM8326	1	0.569123
GM7452	1	0.569
GM43489	1	0.568981
GMCL1	1	0.568758
GM44861	1	0.568563
GM44147	1	0.568233
GM44697	1	0.568187
GPD1	1	0.568116
HECTD3	1	0.567471
GM8069	1	0.567404
GM36995	1	0.567306
GM3739	1	0.5671
GM42870	1	0.567089
GM44986	1	0.566945
GM43808	1	0.566807
GM9826	1	0.566267
GM9967	1	0.566175
GM8451	1	0.565788
HMGN2	1	0.565594
GM43633	1	0.564991
GM773	1	0.564946
GM5976	1	0.56483
HFE	1	0.564658
GM6652	1	0.564507
GM38079	1	0.56386
GM9095	1	0.563571
GM3788	1	0.563278
GM37787	1	0.563204
GM42517	1	0.563048
GM9387	1	0.562987
GM43096	1	0.562377
HEXDC	1	0.562319
GM8392	1	0.562291
GM42528	1	0.562229
GM37963	1	0.562025
GM43513	1	0.56191
GM8036	1	0.561899
GM7353	1	0.561461
HOOK1	1	0.561315
GM8199	1	0.560973
GM6264	1	0.560825
GM43128	1	0.560623
GSG1	1	0.560586
GM6375	1	0.560541
GM4349	1	0.560452
GM5075	1	0.560227
GM42829	1	0.559429
HEMGN	1	0.559317
GM5641	1	0.559233
GM45140	1	0.559123
GM43460	1	0.558804
GRK2	1	0.558678
GM7258	1	0.558156
GM8574	1	0.558035
GM7357	1	0.557769
GM6254	1	0.557707
GM43379	1	0.557628
GM9703	1	0.557568
HIGD1A	1	0.557335
GM9791	1	0.557244
GM43150	1	0.557003
GM44609	1	0.556947
GM44135	1	0.556826
GM4787	1	0.55654
H2-Q7	1	0.556374
GM5466	1	0.556296
GM7061	1	0.556286
GM8098	1	0.556265
H2-Q10	1	0.556102
HDAC6	1	0.556003
GTDC1	1	0.555663
GM5590	1	0.555407
HAL	1	0.554925
GM43272	1	0.554864
HDHD2	1	0.554721
GM8066	1	0.554719
GM37639	1	0.554697
GNL3L	1	0.554696
GPC1	1	0.554321
GM4707	1	0.554118
HEATR6	1	0.55397
GM45420	1	0.553713
GPR153	1	0.553226
GM43587	1	0.552991
GM6055	1	0.552944
GM8885	1	0.552874
GON4L	1	0.552847
GM7079	1	0.552599
GM37981	1	0.552433
GPIHBP1	1	0.552329
H2-DMB2	1	0.552291
GPC4	1	0.552109
HMGB1-PS7	1	0.551083
GM8783	1	0.550817
GM38213	1	0.550774
GM37784	1	0.550768
GM7592	1	0.550551
GMPR	1	0.550511
GM42965	1	0.550478
GM8805	1	0.550393
GM5339	1	0.550333
HIBADH	1	0.549948
GRAP	1	0.549912
GM5842	1	0.549735
GM9038	1	0.549441
GM9816	1	0.549061
GM42820	1	0.549009
HMBS	1	0.548782
GPANK1	1	0.548643
GM8696	1	0.548368
HEMK1	1	0.54812
GM6425	1	0.547702
GM43088	1	0.54731
GM7672	1	0.547275
GTF2H5	1	0.547165
GM826	1	0.547128
GM38021	1	0.547003
GM4705	1	0.546561
GM7030	1	0.546511
HIPK1	1	0.546453
GM43185	1	0.546318
GM6548	1	0.546286
HIGD2A	1	0.546144
GM42572	1	0.546119
GM8412	1	0.545888
HCAR2	1	0.545794
GM8129	1	0.545729
GRIN3A	1	0.545529
GM7856	1	0.545524
GM37776	1	0.545121
GM8925	1	0.545018
GM37127	1	0.544287
GPR34	1	0.543575
GM6517	1	0.54327
GM43136	1	0.543233
GPR4	1	0.543221
GM6823	1	0.542693
GM9403	1	0.542615
GM6104	1	0.542419
GM43584	1	0.542418
GM4899	1	0.542205
GM8738	1	0.541703
GM8250	1	0.541557
GM44735	1	0.541536
GM6286	1	0.541364
GM44731	1	0.54093
GM38056	1	0.54091
GM6266	1	0.540407
GSTT3	1	0.540385
GM30329	1	0.540238
HMCN2	1	0.539915
H2-T-PS	1	0.539867
GM9522	1	0.539837
GM45251	1	0.539552
H2-K2	1	0.539424
GPATCH4	1	0.539129
GM45113	1	0.539033
GM9396	1	0.538926
HMGCL	1	0.538451
GM6658	1	0.538166
GORASP2	1	0.537977
GPBP1L1	1	0.537675
GM6822	1	0.537647
GM7589	1	0.5372
H2-M3	1	0.537184
GM6564	1	0.537107
GM7584	1	0.536932
GM9341	1	0.536528
GM45660	1	0.536498
GM5564	1	0.536093
GM3321	1	0.535948
GM5946	1	0.535499
GM7429	1	0.535498
GM9034	1	0.535401
GM37829	1	0.535152
HINFP	1	0.534642
GM6969	1	0.534511
GM45048	1	0.534349
HLTF	1	0.53434
GM9761	1	0.53422
GM37305	1	0.534106
GM7224	1	0.534065
GM38372	1	0.534057
GM42735	1	0.534005
GM7278	1	0.53387
GM7676	1	0.533628
GM3774	1	0.533149
GM6543	1	0.532965
GM3724	1	0.532796
GM7434	1	0.532322
HIST1H2BR	1	0.531675
GM9613	1	0.531598
GM8953	1	0.531567
HIC1	1	0.531467
GM7407	1	0.531381
GM6430	1	0.531272
GM37144	1	0.531192
GM8349	1	0.531178
GPAA1	1	0.531079
GRB10	1	0.530945
GM7645	1	0.530361
GRB7	1	0.530265
GM5421	1	0.529744
GM7669	1	0.529648
GM38275	1	0.52963
GM42715	1	0.529472
GM45515	1	0.529464
GM9929	1	0.529083
HEG1	1	0.528813
GM37893	1	0.528807
HHAT	1	0.528642
GMEB1	1	0.52861
HEY1	1	0.528517
GM8976	1	0.527866
HJURP	1	0.527516
GM37416	1	0.527387
HAT1	1	0.527198
GM6612	1	0.52623
GM42531	1	0.526214
GM37108	1	0.5262
GM4895	1	0.526147
GM7094	1	0.526112
GPR27	1	0.525726
GM4202	1	0.525566
GM5900	1	0.525107
GM37303	1	0.525055
GM43965	1	0.524985
GM9207	1	0.524785
GM44616	1	0.524773
GM5835	1	0.524657
GM6204	1	0.524622
GM5619	1	0.524606
HOMEZ	1	0.524582
HAUS7	1	0.524088
GREB1L	1	0.5239
GM8172	1	0.523851
GM8343	1	0.523799
GM37579	1	0.523589
GPI1	1	0.523421
GM9256	1	0.523169
GM43682	1	0.523168
GM5100	1	0.523102
GM42595	1	0.523101
GM31105	1	0.522733
GM5291	1	0.522638
GNG7	1	0.522466
GM38244	1	0.522335
GM45212	1	0.52226
GM5903	1	0.522228
GUSB	1	0.522166
GM8982	1	0.522094
GM7468	1	0.521959
GM36445	1	0.521926
GM6136	1	0.521613
GM37499	1	0.521581
GSTM2-PS1	1	0.521555
GM8430	1	0.521351
GZMM	1	0.521274
GM8730	1	0.521266
HMG20A	1	0.521123
GPATCH8	1	0.520785
GM7114	1	0.520369
HACD1	1	0.520059
GPRIN3	1	0.520045
GM44710	1	0.519719
GM5335	1	0.519294
GM9023	1	0.518825
GM9173	1	0.518796
GM42725	1	0.518249
GRHPR	1	0.518201
GM9828	1	0.518177
GM42688	1	0.518075
GM37019	1	0.517717
GPRC5A	1	0.517715
GM6903	1	0.517667
GM44597	1	0.51718
GPKOW	1	0.516992
GM44705	1	0.516958
GNB4	1	0.516681
H2-OB	1	0.516381
GM8909	1	0.516338
HIRIP3	1	0.515776
GM37691	1	0.515671
GPRASP1	1	0.515503
GM38053	1	0.51529
GNB1	1	0.515246
GM36936	1	0.515084
GM6377	1	0.515052
HEXA	1	0.51504
GM44958	1	0.514701
GM44850	1	0.514531
HDDC3	1	0.514482
GM8242	1	0.51437
GM38387	1	0.514241
GM3200	1	0.513971
GM38394	1	0.513798
HNRNPA1L2-PS	1	0.513796
GM45001	1	0.513612
GM38077	1	0.513271
GM32983	1	0.513027
GM4540	1	0.512938
GM4751	1	0.512472
GM43081	1	0.512472
GM6710	1	0.512077
GOT1	1	0.512033
H2-T24	1	0.511927
GNAO1	1	0.511154
GM43338	1	0.511098
GM7281	1	0.511068
GM6762	1	0.511033
GM37274	1	0.51093
GM45338	1	0.510846
GM4691	1	0.510423
GM9001	1	0.510192
GM44036	1	0.510054
GM6341	1	0.51005
GM3716	1	0.509932
GM9083	1	0.509687
GM9625	1	0.509517
GM8750	1	0.509193
GM43059	1	0.508973
GM45235	1	0.508924
GM38188	1	0.508861
GM3604	1	0.508759
GM4890	1	0.508656
GM43863	1	0.508347
GM7206	1	0.508316
GM43766	1	0.5083
GM44686	1	0.508056
GM8836	1	0.507783
GPR146	1	0.507716
GM6123	1	0.507649
GM6520	1	0.507647
GM6483	1	0.507639
GSDMA	1	0.507008
GM5960	1	0.506541
GPR160	1	0.506427
GM7162	1	0.506367
HOXA10	1	0.506343
GM7902	1	0.506248
H19	1	0.506046
GM38220	1	0.506022
GPM6A	1	0.505991
GM7341	1	0.50571
GM8228	1	0.505492
GM8281	1	0.505357
GM7497	1	0.504976
GM44550	1	0.504759
GM37266	1	0.504741
GM3203	1	0.504148
GM44645	1	0.504091
GM5577	1	0.503973
GM37570	1	0.50371
GM6428	1	0.503258
GM37174	1	0.503161
GM7839	1	0.50315
GM5380	1	0.503143
GM5150	1	0.503107
GNA15	1	0.502973
HEPHL1	1	0.502949
GM44261	1	0.502718
GP1BA	1	0.502668
GSTM5	1	0.50257
GM9796	1	0.502459
GM6593	1	0.502238
GM7516	1	0.501924
GM5587	1	0.501855
GM37790	1	0.501793
GM9009	1	0.501517
GM34379	1	0.501491
GM8174	1	0.500771
GM9008	1	0.500314
GM44669	1	0.500168
GM7241	1	0.49993
GM37121	1	0.499856
GM43951	1	0.499615
GM8093	1	0.499134
GNG11	1	0.498843
H2-EB2	1	0.498621
GM7091	1	0.498498
GPR19	1	0.498044
GM44220	1	0.498043
GM9711	1	0.49793
GM8850	1	0.497807
HOMER2	1	0.497597
GM38384	1	0.497371
GXYLT2	1	0.497137
GM8797	1	0.496861
GMNN	1	0.49675
GM8254	1	0.496723
GM3348	1	0.496478
GM8618	1	0.496465
GM37621	1	0.49638
H2-AB1	1	0.495982
GPT2	1	0.49588
HCFC1R1	1	0.495585
GM8606	1	0.4955
GM8731	1	0.495417
GREM1	1	0.495252
GM7609	1	0.495078
GPR39	1	0.494929
GRIA3	1	0.494922
GM7560	1	0.494686
HARBI1	1	0.494375
GM44758	1	0.494366
GM336	1	0.494033
GM37819	1	0.493939
HIF1A	1	0.493696
GM44260	1	0.493694
GM45632	1	0.493615
GM44401	1	0.493323
GM37962	1	0.493128
GM43618	1	0.492895
GM7832	1	0.492843
GM4997	1	0.492722
GM5124	1	0.492684
GM6162	1	0.492675
GM7599	1	0.4926
GPSM2	1	0.492301
GM43555	1	0.492099
GM6060	1	0.492098
GUF1	1	0.491994
GM37800	1	0.491967
GM36189	1	0.491928
GM9530	1	0.491799
GM7463	1	0.49169
GM43692	1	0.491487
GM9889	1	0.491304
GOSR2	1	0.491001
GM44423	1	0.490941
GM7848	1	0.490653
GM6556	1	0.490551
GM6745	1	0.490536
GTF3C6	1	0.490456
GM5530	1	0.49038
GM44174	1	0.489851
HELZ	1	0.489702
GM5871	1	0.489559
HGFAC	1	0.489422
GTF2I	1	0.489203
HNRNPR	1	0.489151
GM6606	1	0.489129
GRIN2D	1	0.488866
GM9780	1	0.488515
GM44321	1	0.488441
GM30023	1	0.488342
HNRNPL	1	0.48834
H2-T10	1	0.488239
GM7722	1	0.487952
H2-OA	1	0.487708
HAVCR2	1	0.487142
GPNMB	1	0.48688
GM9169	1	0.486662
GM43127	1	0.48653
GM44180	1	0.486433
GM6153	1	0.485473
GM6659	1	0.485249
GM44164	1	0.485207
HMOX2	1	0.485142
GTF2IRD2	1	0.485009
GM44582	1	0.484727
GREM2	1	0.48443
GM43549	1	0.484194
GM43694	1	0.484128
GM7507	1	0.483957
GM38124	1	0.483956
GM7804	1	0.483904
GPR35	1	0.4836
GM44911	1	0.483561
GM42778	1	0.483556
HAGH	1	0.48353
GTF2A1	1	0.483371
GM37226	1	0.483358
GM8503	1	0.483275
H2-M9	1	0.483259
GM7901	1	0.483195
GM6210	1	0.482945
GM6637	1	0.482627
GM7890	1	0.482463
HEY2	1	0.48236
GM4631	1	0.482354
GM6905	1	0.482271
HAUS5	1	0.481649
GM37233	1	0.481632
GMPS	1	0.481487
HMGN3	1	0.481411
GM43138	1	0.480678
GM9369	1	0.480424
GM5612	1	0.480189
HMGA1	1	0.480017
GM9794	1	0.479906
GM31749	1	0.479794
GM7393	1	0.479785
H3F3B	1	0.479762
GM8545	1	0.479699
GUCD1	1	0.479262
GM36989	1	0.479067
GM37486	1	0.478843
GM43481	1	0.47862
GM42742	1	0.478572
GM44509	1	0.478365
GRIP2	1	0.478157
GM4332	1	0.478118
HNRNPLL	1	0.477714
GM38208	1	0.477601
GNL1	1	0.477547
GM6505	1	0.477518
GM6051	1	0.477469
GM42979	1	0.477423
GM4204	1	0.477319
GM43254	1	0.477004
GM37694	1	0.476747
GM4986	1	0.476722
HBA-A2	1	0.476658
GORASP1	1	0.476578
GM8209	1	0.476306
GM9103	1	0.476304
GM45059	1	0.476128
GRPR	1	0.47586
HACD3	1	0.475715
GM7869	1	0.475674
GVIN1	1	0.475614
HMGB1-PS6	1	0.475516
GPRASP2	1	0.475373
GPER1	1	0.475354
GM9333	1	0.475306
GM31274	1	0.474906
GM37969	1	0.474589
HNRNPAB	1	0.474419
GTF2A2	1	0.474142
GPAT4	1	0.474125
GM7498	1	0.474023
GM5070	1	0.473873
HAS2	1	0.473415
GM43858	1	0.473351
HNMT	1	0.472663
GM43912	1	0.472546
GM32460	1	0.472442
GM5298	1	0.472362
HDAC7	1	0.472347
GM5529	1	0.472197
HAUS8	1	0.471712
GM8539	1	0.47144
GRCC10	1	0.470727
GM973	1	0.470284
GM43457	1	0.470221
GNA13	1	0.470086
H2-DMA	1	0.470077
GM9803	1	0.469945
GM7384	1	0.469869
GM7269	1	0.469804
HBB-BS	1	0.469675
GNG12	1	0.46937
GM7367	1	0.469202
HDGF	1	0.469143
HDAC10	1	0.469083
GNB2	1	0.468922
GM6871	1	0.468696
GM42913	1	0.468299
GM8458	1	0.467807
HMGCS2	1	0.467735
GRM7	1	0.467718
GPC2	1	0.467715
GM8436	1	0.467619
GM45120	1	0.467576
GM8319	1	0.467545
GM4596	1	0.466962
GPR68	1	0.466472
GM8482	1	0.466356
GM43963	1	0.466248
GM5535	1	0.466233
HIVEP2	1	0.466173
GM6211	1	0.466139
GM4518	1	0.465753
GPR182	1	0.465661
GM5224	1	0.465576
GM45495	1	0.46546
HGSNAT	1	0.465425
HMOX1	1	0.465032
GM9824	1	0.464828
GNAI2	1	0.464775
GM37320	1	0.464664
GM4617	1	0.464332
GM37053	1	0.464181
GM5315	1	0.464148
GM43105	1	0.464093
GM7504	1	0.464059
GM43840	1	0.463516
GM38190	1	0.463478
GM4724	1	0.463289
HIRA	1	0.463263
GM7324	1	0.463157
HNRNPD	1	0.462502
GM38155	1	0.462145
GM6141	1	0.462105
GM7897	1	0.461927
H2-EB1	1	0.461752
H60C	1	0.461652
GM5597	1	0.461581
GM37660	1	0.460714
HHEX	1	0.460597
H2-DMB1	1	0.460498
GM45216	1	0.460457
H2-AA	1	0.460334
GM4873	1	0.460049
GM7701	1	0.460042
GM43703	1	0.460037
GM43309	1	0.459864
HERC1	1	0.459834
GM7665	1	0.459691
GM6263	1	0.459673
GM43672	1	0.45967
GM8984	1	0.459596
GM7541	1	0.459584
GM5069	1	0.45944
GM5620	1	0.459212
HNRNPDL	1	0.459019
GM43434	1	0.458989
GM6444	1	0.458831
GM45403	1	0.458468
GSTO1	1	0.458226
GM7331	1	0.458147
GM5539	1	0.45811
GM38102	1	0.457373
GM6939	1	0.457195
GM42732	1	0.456909
GM8580	1	0.456262
GM8508	1	0.456231
GM7816	1	0.456206
GM7694	1	0.456083
GM38057	1	0.456081
HAUS3	1	0.455796
GM7335	1	0.455396
GM5408	1	0.455379
HEPH	1	0.455293
GM9025	1	0.455122
HNRNPK	1	0.454805
GM8210	1	0.454649
GM45629	1	0.454443
HCFC1	1	0.454267
GM38040	1	0.453809
GM7565	1	0.453505
GM43042	1	0.453274
GM43143	1	0.453152
GM43712	1	0.453041
GM37254	1	0.452603
GM3756	1	0.452352
HDLBP	1	0.452157
GM44891	1	0.451889
GM5940	1	0.451831
GM6394	1	0.45141
GM37760	1	0.451139
GM42670	1	0.450615
GM9575	1	0.450601
HEATR9	1	0.450462
GM37292	1	0.450461
GM38319	1	0.450401
GM38020	1	0.450369
GM7997	1	0.45025
HIPK3	1	0.450163
GNG8	1	0.450062
HCN1	1	0.449941
GM6305	1	0.449594
GM5297	1	0.449368
HEBP1	1	0.449171
GM5321	1	0.448813
GM37074	1	0.448727
HIKESHI	1	0.448558
HDC	1	0.448452
GM7638	1	0.448373
GM30708	1	0.448304
GM43041	1	0.448272
GM9540	1	0.447803
GM37902	1	0.447696
GPAT2	1	0.447661
GM43524	1	0.44756
GM7785	1	0.447552
HLF	1	0.447487
GM37795	1	0.447367
HOOK2	1	0.446975
GM7290	1	0.44692
GM5912	1	0.446815
GM6640	1	0.446402
GSK3B	1	0.44611
GPRC5D	1	0.445979
GM7776	1	0.445966
GM9754	1	0.444969
GM5576	1	0.444898
GSTP-PS	1	0.444572
GM9869	1	0.444571
GM4875	1	0.444449
GOLT1B	1	0.444403
GM7984	1	0.444349
GM5558	1	0.444294
GM6740	1	0.444138
GM5987	1	0.44382
GM5560	1	0.44313
GM8587	1	0.443084
GM3470	1	0.443056
GM43422	1	0.442943
GM43848	1	0.442751
GM8173	1	0.442678
GM37421	1	0.442539
GM4217	1	0.442443
GM8292	1	0.441993
GPX7	1	0.44182
HOTAIRM1	1	0.44161
GM5479	1	0.441564
GNPDA2	1	0.441391
GM3940	1	0.441299
GM37239	1	0.441225
GM43097	1	0.44115
GNAZ	1	0.440348
HMGCLL1	1	0.440024
HDAC1	1	0.440009
GM43759	1	0.439693
GM44659	1	0.439657
HADH	1	0.43959
GM43655	1	0.43948
GM8893	1	0.439332
GM8902	1	0.439325
GM8597	1	0.439242
GM7803	1	0.43884
GM43029	1	0.438427
GPR63	1	0.43834
GM5865	1	0.437972
GM34121	1	0.437899
HIF3A	1	0.43747
GM6872	1	0.437204
GM6450	1	0.437078
GM5049	1	0.437005
GM42635	1	0.43685
GPR176	1	0.436494
GM7973	1	0.436315
H2-T22	1	0.436206
GM45091	1	0.436176
GM4849	1	0.436015
GM38305	1	0.435951
GM5550	1	0.43574
GM6085	1	0.435541
GM9774	1	0.43537
GM6828	1	0.434923
GM42577	1	0.434735
HID1	1	0.434691
GM39288	1	0.434581
GM6039	1	0.434551
GM9694	1	0.434372
GM45351	1	0.434161
GM4859	1	0.433854
HIF1AN	1	0.433739
GM8756	1	0.433571
GSPT2	1	0.433501
GM5578	1	0.433398
GM43034	1	0.433256
GM7492	1	0.433165
GM3331	1	0.432927
GM5678	1	0.432838
GM44836	1	0.432613
GM43068	1	0.432438
GM6292	1	0.432393
GNPTAB	1	0.43209
GM5644	1	0.431876
GM9733	1	0.431861
GM8826	1	0.431724
GM8492	1	0.431716
GULP1	1	0.431589
GM5431	1	0.43158
GM7180	1	0.431571
GM6733	1	0.431403
GM8401	1	0.431247
GM38157	1	0.431191
GM38228	1	0.431085
GM43151	1	0.430672
GM7862	1	0.430558
GM9830	1	0.430389
GM5259	1	0.430208
GPATCH1	1	0.430029
GTF3A	1	0.42993
GM4879	1	0.429806
GM5914	1	0.429726
GM45650	1	0.428915
GM43445	1	0.428914
GM43668	1	0.428463
GM43681	1	0.428313
GPX4	1	0.428262
GM5356	1	0.427733
GM7774	1	0.427672
GM38005	1	0.427362
GM4734	1	0.427095
GM5278	1	0.427079
GM8206	1	0.426753
GM5281	1	0.426694
GM5611	1	0.426658
HES6	1	0.426638
GM8566	1	0.426419
GM4951	1	0.426374
GM5528	1	0.426232
GM5851	1	0.426067
GM5845	1	0.425185
GM37201	1	0.424265
GTF2H1	1	0.4242
GM42890	1	0.42416
GM6679	1	0.424011
GOT2	1	0.423799
HIVEP3	1	0.422798
GM8773	1	0.422474
GRAMD4	1	0.422222
HDDC2	1	0.421776
GM5963	1	0.421439
HIBCH	1	0.421435
GM5931	1	0.421427
GM4924	1	0.42123
GM44424	1	0.421144
GM43080	1	0.421116
GM43413	1	0.421011
GM7618	1	0.420907
GM7809	1	0.420815
GPN1	1	0.420532
GM5879	1	0.42051
GM8810	1	0.420454
GM5113	1	0.420288
GM43679	1	0.420143
GM36961	1	0.420119
GM45250	1	0.420116
GM6352	1	0.420072
GM37844	1	0.4199
GM5637	1	0.419812
GM8515	1	0.419743
GM38336	1	0.419575
GM7927	1	0.419302
GM43142	1	0.419259
GM9165	1	0.419075
GM6916	1	0.419022
GM8815	1	0.418958
GM44075	1	0.418778
GM7389	1	0.418534
HELQ	1	0.418496
GM9252	1	0.418271
GM5990	1	0.418237
GMEB2	1	0.418046
GPRC5B	1	0.417952
GM8930	1	0.417871
GM37249	1	0.417835
GM7451	1	0.417594
GM4865	1	0.417592
GM44389	1	0.417341
GM9762	1	0.417168
GM5863	1	0.417153
GM37490	1	0.417142
GM7808	1	0.417131
GM32158	1	0.417072
GM38025	1	0.416926
GM43693	1	0.416813
GM35570	1	0.41671
HNRNPF	1	0.416549
H2-M10.6	1	0.416345
HLX	1	0.415958
GM45437	1	0.415924
HBA-A1	1	0.415881
HMGN1	1	0.415869
GM5067	1	0.415843
HMMR	1	0.415543
GM7823	1	0.415453
GM7123	1	0.415401
GM44066	1	0.41536
GM45449	1	0.41532
GM6525	1	0.41523
H2-Q1	1	0.41522
GRRP1	1	0.415106
GM42575	1	0.414864
GM3511	1	0.414779
GRWD1	1	0.41469
GRAMD2	1	0.414383
GM43719	1	0.4143
HECTD2	1	0.414251
GM43203	1	0.41412
GM42600	1	0.413806
GNG2	1	0.413289
GM7416	1	0.413213
GM44860	1	0.412431
GM7146	1	0.412394
GM9097	1	0.411909
GM6159	1	0.411124
HOXA11OS	1	0.411075
GSPT1	1	0.410933
GM3695	1	0.410874
GM42666	1	0.41086
HMCES	1	0.41081
GM8532	1	0.41035
HMGB1-PS1	1	0.41031
H60B	1	0.410201
HIPK2	1	0.410039
GM45684	1	0.40864
GM7972	1	0.408636
GM42793	1	0.408133
GOLGB1	1	0.408113
GTPBP8	1	0.407888
GM4482	1	0.407703
GTF2E1	1	0.407269
GM8388	1	0.40715
GM9434	1	0.407108
GM42929	1	0.40703
GM43914	1	0.406947
GM4880	1	0.40631
GM9260	1	0.406293
GM7561	1	0.406211
GM9234	1	0.406187
GM44851	1	0.406125
HMGB1-PS5	1	0.40569
GM4759	1	0.405627
HDHD3	1	0.405392
GM43389	1	0.404822
HK1	1	0.404734
GM6206	1	0.404433
GM6728	1	0.404354
GM35549	1	0.404318
HOPX	1	0.404163
GM5073	1	0.403452
GM37881	1	0.403343
GM6615	1	0.403267
GM8615	1	0.403072
GM33707	1	0.40284
GSTK1	1	0.402524
GPR88	1	0.402507
GM454	1	0.402486
GM44085	1	0.402447
GM45380	1	0.401597
GRPEL1	1	0.401327
GM5834	1	0.401279
GM42559	1	0.400916
GM6335	1	0.400848
GM44950	1	0.400659
GM43351	1	0.400159
HK3	1	0.400143
GPR171	1	0.400027
HERC2	1	0.400017
GM4524	1	0.399701
GM37696	1	0.39954
GM4962	1	0.399494
GM6108	1	0.398892
GM44053	1	0.39861
GM31520	1	0.398538
HOXA11	1	0.398494
GM7805	1	0.398389
GM9378	1	0.398288
GM37169	1	0.398196
HDX	1	0.398181
GM4157	1	0.398035
HHATL	1	0.398001
GM5525	1	0.397997
GPLD1	1	0.397959
HMGXB4	1	0.397389
GM9727	1	0.397137
GM9392	1	0.397022
GM43431	1	0.397008
HILPDA	1	0.396933
GM45222	1	0.39688
GM9521	1	0.396872
GM4968	1	0.396568
GM8722	1	0.396558
GPR155	1	0.396502
GM8260	1	0.396474
GM37352	1	0.39622
GM4742	1	0.396075
GM44037	1	0.395441
GM7332	1	0.395348
GM5915	1	0.395344
GM9655	1	0.395194
GRM8	1	0.39511
GM42764	1	0.395016
GM37637	1	0.394884
GM5117	1	0.394882
GTF2H4	1	0.393745
GSTM1	1	0.393464
GRIK5	1	0.393424
HES7	1	0.393325
GM37968	1	0.393149
GM8099	1	0.393097
HMG20B	1	0.392995
GM38312	1	0.39271
GM3636	1	0.392337
GM5939	1	0.39227
GM5751	1	0.392165
GM45456	1	0.39213
GPBP1	1	0.391948
GM5320	1	0.391845
GM6723	1	0.391596
GM6175	1	0.391579
GM7707	1	0.391312
GM43471	1	0.391217
GM3052	1	0.391088
GM3362	1	0.390498
GM42743	1	0.390026
GM6808	1	0.389853
GM2A	1	0.389562
GPR89	1	0.389556
GM8314	1	0.389305
GM43935	1	0.389189
HACL1	1	0.38913
GM5586	1	0.387961
GTPBP2	1	0.387841
GM7082	1	0.387755
HOMER1	1	0.387639
GM7019	1	0.387606
GM5582	1	0.387561
GM37261	1	0.387542
GTF3C3	1	0.387501
H2-K1	1	0.38745
GM8459	1	0.387126
HADHB	1	0.386904
GM6977	1	0.386817
GM6088	1	0.386543
GM5884	1	0.386359
GM7600	1	0.386237
GM5944	1	0.386172
GM7150	1	0.386055
GM8062	1	0.385846
GM5763	1	0.385733
GM44249	1	0.385507
GM7199	1	0.384746
GM9435	1	0.384691
GM44415	1	0.384678
GOLPH3L	1	0.384609
GM6222	1	0.384293
GSTT1	1	0.384268
GM38250	1	0.384166
GM8019	1	0.384157
GM5340	1	0.384096
GM8494	1	0.383799
GM9484	1	0.383684
GNAS	1	0.383346
GPR179	1	0.383314
GM37768	1	0.383193
GM44175	1	0.383121
GM9273	1	0.383106
GM44013	1	0.382393
GMIP	1	0.382286
GM5617	1	0.381966
GM8116	1	0.381624
GM7895	1	0.381603
GSAP	1	0.381396
GM4117	1	0.381336
GM43924	1	0.381201
GPR82	1	0.381014
GM5086	1	0.380869
GM38248	1	0.380833
GTF2H3	1	0.380759
GM6560	1	0.380494
GM6712	1	0.380231
GM43737	1	0.379904
H13	1	0.379887
GZF1	1	0.379841
GPD1L	1	0.379783
GM7153	1	0.379652
GM42783	1	0.379458
GRSF1	1	0.379434
GM37025	1	0.379375
GOLGA2	1	0.379138
GM5456	1	0.379097
GM42776	1	0.379048
GM7899	1	0.378973
GNPAT	1	0.378748
GM42798	1	0.378399
GM3375	1	0.378167
GPX3	1	0.378035
GM45527	1	0.37796
HDAC4	1	0.37791
GM7292	1	0.377437
HNRNPA2B1	1	0.377254
GM7967	1	0.376957
GM8980	1	0.376383
HELLS	1	0.376227
GM8213	1	0.376035
GM4989	1	0.375933
GM43268	1	0.375836
GM8669	1	0.375748
GM5920	1	0.375744
GM7289	1	0.375705
GM7266	1	0.375689
GM5065	1	0.375674
GM45493	1	0.375652
GM6257	1	0.375475
GRK3	1	0.375473
GM6501	1	0.375349
GM6887	1	0.375207
GM5308	1	0.37511
GM6034	1	0.374693
GM43814	1	0.374534
GM5883	1	0.37452
HAX1	1	0.3744
HDAC11	1	0.374367
GM5051	1	0.374293
GM42031	1	0.37425
GM9645	1	0.374231
HINT2	1	0.374149
GM7867	1	0.374066
GYG	1	0.373876
GM8623	1	0.373567
GM6316	1	0.37354
GM5134	1	0.373508
GM8995	1	0.373373
GM4468	1	0.373219
GM37422	1	0.373202
GM5148	1	0.373091
GM42430	1	0.372626
GUK1	1	0.372184
GM4953	1	0.371905
GPN3	1	0.371331
HAS2OS	1	0.371234
GM6308	1	0.371221
GM4876	1	0.370914
GTPBP3	1	0.370656
GM4961	1	0.370577
GTF3C1	1	0.370276
GM8741	1	0.370188
GSTM2	1	0.370101
HERPUD1	1	0.370071
GM6368	1	0.370001
GPR33	1	0.369415
GM6054	1	0.369213
GM42962	1	0.368761
GOLGA7	1	0.368698
GM42372	1	0.368624
GOLIM4	1	0.368523
GM7857	1	0.368223
GM7287	1	0.368044
GM8624	1	0.367331
GM38192	1	0.367155
GM8425	1	0.367129
HDAC3	1	0.366936
GM43800	1	0.36691
GM5318	1	0.366652
GTF3C5	1	0.366352
GM4070	1	0.366213
GM43857	1	0.366208
GNG5	1	0.365963
GM8989	1	0.365862
GM43597	1	0.365839
GM9497	1	0.36571
GM44087	1	0.365527
GM9457	1	0.365405
GM5537	1	0.365023
GM3170	1	0.364953
HDAC2	1	0.364129
GM5898	1	0.364071
GM6445	1	0.3638
GM6197	1	0.363658
GM4853	1	0.36307
GM36964	1	0.362943
GSS	1	0.362766
GM9917	1	0.362397
GM42659	1	0.362326
GM3752	1	0.36166
GM5141	1	0.361587
GM5353	1	0.36145
GM44292	1	0.361315
GM43442	1	0.361307
GM43305	1	0.360678
HAGHL	1	0.360458
H2-BL	1	0.360432
GM6227	1	0.360365
GM6063	1	0.360117
GT(ROSA)26SOR	1	0.360058
GM43980	1	0.360038
HC	1	0.359892
GNG10	1	0.359761
HCCS	1	0.359602
GM44419	1	0.359426
GM45309	1	0.359263
GM44941	1	0.359229
GM45220	1	0.35919
HAO1	1	0.358976
GM38037	1	0.358791
GM45308	1	0.35867
HOOK3	1	0.358603
GPATCH3	1	0.358442
GM44227	1	0.35827
GM45150	1	0.358246
GM5566	1	0.358024
GM9604	1	0.357994
GM5853	1	0.35797
GM7729	1	0.357928
GM3571	1	0.357872
GM8641	1	0.357871
GM5561	1	0.357795
GM3555	1	0.357656
HCAR1	1	0.357579
GM44521	1	0.357399
HMBOX1	1	0.357085
GM38253	1	0.356857
GM43609	1	0.356428
GM44103	1	0.35618
GM6426	1	0.356173
GM44763	1	0.356025
GM9105	1	0.35591
HAPLN4	1	0.355844
GM6755	1	0.355421
GM8520	1	0.355229
GRHL2	1	0.354632
HNRNPA3	1	0.354157
GM38317	1	0.354017
GM8666	1	0.353852
GM5602	1	0.353664
HDAC5	1	0.353621
GM45246	1	0.353484
GM35147	1	0.35338
GM8121	1	0.353149
HARS2	1	0.3528
GM7118	1	0.352655
GSTM3	1	0.352485
GM9285	1	0.352229
GM7160	1	0.352078
GM5616	1	0.35198
GM6195	1	0.351897
HGS	1	0.35089
GM5873	1	0.350797
GM8752	1	0.35074
GM4754	1	0.350395
GM4761	1	0.350081
GM9134	1	0.349886
GM45552	1	0.349872
GM6982	1	0.349696
H3F3A	1	0.349349
GM3076	1	0.349179
GM9115	1	0.349088
GM8978	1	0.348831
GPC3	1	0.347855
GM43300	1	0.347406
GM3512	1	0.34739
GM5527	1	0.347063
GSTA4	1	0.346896
GM5869	1	0.346877
GOLGA4	1	0.346844
GM43461	1	0.346771
GM44168	1	0.346706
GM4374	1	0.346689
GM8034	1	0.346516
GM9432	1	0.345895
GM43071	1	0.345771
GM5127	1	0.345581
GSR	1	0.345462
GM5555	1	0.345119
HCN3	1	0.345048
GM5857	1	0.344964
HCN2	1	0.344759
GM43660	1	0.344469
GRAMD1B	1	0.343987
GNGT2	1	0.343882
GM8261	1	0.343853
GM42818	1	0.343645
GM4963	1	0.343589
GM36551	1	0.343462
GM38247	1	0.343338
GM42940	1	0.343187
GM7327	1	0.342994
GM31026	1	0.342887
GM5263	1	0.342742
GM37353	1	0.342394
GM5050	1	0.342203
GM38300	1	0.342167
GM614	1	0.341986
GM43124	1	0.341672
GM6568	1	0.341479
GM8860	1	0.34121
GM8659	1	0.340851
GM9347	1	0.339805
GM37581	1	0.339402
GM44623	1	0.339354
HERC3	1	0.339276
GM6439	1	0.339034
H2-Q6	1	0.338682
GM9299	1	0.338521
GM6510	1	0.338041
GM43412	1	0.337727
GM44154	1	0.337699
GM37145	1	0.337572
HIP1R	1	0.337335
GM5322	1	0.337277
GM38391	1	0.33705
GTPBP10	1	0.336982
HECW2	1	0.336938
GSTM4	1	0.336931
GM43327	1	0.336814
GM7993	1	0.335846
GM9419	1	0.335239
GM4553	1	0.335204
GM4788	1	0.334976
GM5254	1	0.334853
GM4973	1	0.334567
GM5776	1	0.334164
HCN4	1	0.333239
H2-M10.5	1	0.333049
HBB-BT	1	0.33285
HBP1	1	0.33285
GM8113	1	0.332605
GRB14	1	0.332438
GM4992	1	0.332366
GM5850	1	0.332348
GM4189	1	0.332285
GM5422	1	0.332197
GM7027	1	0.332021
HAUS6	1	0.331615
GTPBP6	1	0.331597
GM8330	1	0.331418
HIST1H2BQ	1	0.331396
GM35339	1	0.331388
GM6142	1	0.331359
GM4972	1	0.331336
GM45053	1	0.331163
GM8835	1	0.331017
GM8774	1	0.330997
GM6451	1	0.329623
GM43604	1	0.329554
GM6004	1	0.329266
GM4735	1	0.329248
GM38050	1	0.329178
GM5913	1	0.329118
GM5510	1	0.328645
GMPPA	1	0.328613
GM44662	1	0.328307
GM37317	1	0.328259
GM6801	1	0.328144
GM4835	1	0.327154
GM43205	1	0.326592
GM4462	1	0.326511
GM7251	1	0.326305
GM5682	1	0.326047
HMGA2	1	0.325051
GM42967	1	0.324939
GM7879	1	0.324299
GM2996	1	0.324101
GMPPB	1	0.323961
GM7102	1	0.323857
GM42658	1	0.323804
H2-M6-PS	1	0.323433
HIGD1B	1	0.322377
GM9531	1	0.322282
GM4366	1	0.322195
GM37494	1	0.322187
GM8061	1	0.321895
GM8369	1	0.321832
GM5605	1	0.321774
GM30978	1	0.321741
GM8337	1	0.321257
GM42748	1	0.321158
GM8177	1	0.320981
GM5648	1	0.320876
GM6012	1	0.320804
GM44949	1	0.320409
GRN	1	0.319952
GM37176	1	0.319251
GM9833	1	0.319182
GM7436	1	0.318841
GM42462	1	0.318638
GNAI1	1	0.318559
GM5828	1	0.318012
GM5548	1	0.317955
GM3667	1	0.317773
HIST1H4N	1	0.317507
GM37607	1	0.317303
HIPK4	1	0.316967
GM44978	1	0.31654
H2-Q5	1	0.316379
GNE	1	0.316326
GM45606	1	0.315932
GM4767	1	0.313925
GM4784	1	0.313871
GRB2	1	0.313623
GPATCH2	1	0.313439
GM9294	1	0.31318
GM5970	1	0.313097
GM45221	1	0.312811
GM5864	1	0.312772
GM4613	1	0.312729
H2-KE6	1	0.311569
GM5841	1	0.30927
GRIN3B	1	0.308632
GM5526	1	0.308561
GM45454	1	0.308237
GM43328	1	0.308209
GM8643	1	0.307759
GM5697	1	0.307703
GM5881	1	0.307358
GM7108	1	0.306861
GM5837	1	0.306071
GM5801	1	0.305685
GZMD	1	0.305622
GRIK3	1	0.305422
GM42727	1	0.305419
GM5398	1	0.304076
HEBP2	1	0.30382
GSTO2	1	0.303711
GM33994	1	0.303311
HERPUD2	1	0.30127
GTF2B	1	0.301257
GM37953	1	0.301183
GM6473	1	0.300225
H2-Q2	1	0.300206
GM45592	1	0.299938
GOLGA3	1	0.299888
GM43984	1	0.29974
GM8806	1	0.299418
GM43990	1	0.29915
GRTP1	1	0.29881
GM8307	1	0.298337
GPR85	1	0.298088
GM4987	1	0.296897
GM33370	1	0.296775
GM9517	1	0.296639
GM45137	1	0.296265
HELZ2	1	0.295704
GM8878	1	0.295505
GM8856	1	0.295134
GM4459	1	0.294908
GM5711	1	0.294777
GM5905	1	0.294625
GM44165	1	0.293836
GM42636	1	0.293476
GM6140	1	0.292837
GORAB	1	0.291396
GPD2	1	0.290656
GM6565	1	0.290262
GM42928	1	0.289267
GM3531	1	0.289246
GM4860	1	0.289194
GM9910	1	0.288577
GM5112	1	0.288091
GM7424	1	0.287669
GM5303	1	0.287478
GMFB	1	0.287433
GM44901	1	0.286842
GM8325	1	0.286781
HMX2	1	0.286751
GPR157	1	0.28673
GM3145	1	0.286387
GM5547	1	0.286332
GM7553	1	0.285915
GM7308	1	0.285359
GM45418	1	0.283545
GM7336	1	0.282665
GM8862	1	0.282437
GM6157	1	0.282096
GM5614	1	0.281949
GM44065	1	0.281154
GM35315	1	0.280977
HIST1H4M	1	0.278686
GM5687	1	0.278469
GM37584	1	0.277219
GM43062	1	0.277033
GM43769	1	0.275362
GXYLT1	1	0.27501
GM37592	1	0.274982
GM7265	1	0.274417
GM37033	1	0.274261
GM45094	1	0.273946
GM4535	1	0.273722
GM6187	1	0.273301
HMGB3	1	0.271404
GM8648	1	0.271088
HNRNPM	1	0.270436
GM43181	1	0.270393
H3F3C	1	0.26955
GM33280	1	0.269281
GM9574	1	0.268481
GM6767	1	0.26753
GM44667	1	0.26737
HDAC9	1	0.267359
GM4756	1	0.266538
GM43031	1	0.266114
GM6498	1	0.26539
GNA11	1	0.264054
GM9409	1	0.263758
GM43214	1	0.263426
GM5532	1	0.263155
GM6542	1	0.262952
GM6851	1	0.261106
GPR17	1	0.260619
GM44646	1	0.259728
GM4750	1	0.259215
H2-M5	1	0.258763
GM5540	1	0.258062
GM5855	1	0.257602
GM5909	1	0.257528
GM4285	1	0.257464
HOXA1	1	0.256276
GM5997	1	0.255298
GM9431	1	0.254169
GM35106	1	0.25353
GSTM7	1	0.250758
HK2	1	0.250629
GM6069	1	0.250004
HK1OS	1	0.249636
GM3617	1	0.248278
GM5702	1	0.247125
GM44226	1	0.245817
GM5551	1	0.243452
GM5832	1	0.243405
H2-T3	1	0.243003
GOLGA1	1	0.241455
GM45596	1	0.24088
GM5459	1	0.239004
GM43517	1	0.238648
GNAQ	1	0.237624
GM5760	1	0.236794
GM45453	1	0.236317
GM43245	1	0.234219
GM5662	1	0.233367
GM6226	1	0.233322
GM9888	1	0.23133
GM37313	1	0.228839
GM7871	1	0.228424
GM5256	1	0.228265
GM7619	1	0.227609
GM4575	1	0.226397
GM6522	1	0.226123
GM30238	1	0.224844
GM5778	1	0.223255
GM44284	1	0.218068
GM45337	1	0.217475
HNRNPH2	1	0.21535
GYS1	1	0.213704
GM38158	1	0.209313
HMGB1	1	0.208125
GM5406	1	0.208109
GPM6B	1	0.201172
GM45564	1	0.200254
GM6493	1	0.194883
ARHGAP27	2	0.638328
APOBEC1	2	0.638073
2310058D17RIK	2	0.637407
ALOX5	2	0.636372
ADGRL2	2	0.631275
4833427G06RIK	2	0.629806
APOOL	2	0.629408
9430062P05RIK	2	0.626201
ANGPTL7	2	0.62558
ALDOC	2	0.625075
ALKBH3	2	0.623653
ARL1	2	0.623603
2310033P09RIK	2	0.623122
ANAPC2	2	0.622648
ARFGEF2	2	0.620812
1700029J07RIK	2	0.62067
ASAP3	2	0.619984
AURKA	2	0.618623
ADIPOR1	2	0.618497
ALG6	2	0.617849
AK1	2	0.617448
2210408I21RIK	2	0.616678
1700034H15RIK	2	0.616091
ANXA11	2	0.615988
AI506816	2	0.615959
A730020E08RIK	2	0.615835
AIDA	2	0.615814
BCL3	2	0.615119
AKR1C12	2	0.615047
APRT	2	0.614752
BMP2	2	0.614452
ANKRD23	2	0.613077
ATP1A3	2	0.612653
ATP6V1E1	2	0.612465
ARAF	2	0.612231
AHCTF1	2	0.61108
2310002L09RIK	2	0.610623
4833439L19RIK	2	0.610612
ANKRD33B	2	0.609923
AGBL5	2	0.608791
1110006O24RIK	2	0.608044
4933427G23RIK	2	0.607978
4933431K14RIK	2	0.607943
APOE	2	0.607859
ALB	2	0.607529
2510002D24RIK	2	0.607501
ADAP2OS	2	0.607407
ARPC4	2	0.607347
ABCA3	2	0.607063
ALG8	2	0.606927
APPL2	2	0.606834
ARHGEF17	2	0.606352
AP4B1	2	0.606161
ARPC1A	2	0.604768
A030005K14RIK	2	0.604636
ANKRD52	2	0.603864
ADH1	2	0.603712
ANPEP	2	0.603555
ATP13A2	2	0.603256
2610307P16RIK	2	0.603017
AB124611	2	0.602786
5830417I10RIK	2	0.602138
BIN2	2	0.601362
A630023A22RIK	2	0.601331
BHLHE22	2	0.601027
2700099C18RIK	2	0.60079
BLVRB	2	0.600677
ADGRG6	2	0.600526
4921531C22RIK	2	0.600464
BATF3	2	0.600339
ABCC1	2	0.600131
BCAS3	2	0.600069
AUP1	2	0.600007
ASB12	2	0.599784
APEX1	2	0.598315
ABCA8A	2	0.598218
AGAP3	2	0.598055
4921524J17RIK	2	0.597492
BCAM	2	0.597409
AARSD1	2	0.597015
4930430E12RIK	2	0.596911
A930006K02RIK	2	0.59635
ARRDC1	2	0.596013
B430212C06RIK	2	0.595663
6030468B19RIK	2	0.595427
ATF1	2	0.59522
ANKIB1	2	0.595114
1700017B05RIK	2	0.594809
BCL11A	2	0.594627
ABHD12	2	0.594464
APEH	2	0.593978
ARC	2	0.593934
ATF7	2	0.593856
4930447F24RIK	2	0.593512
ANTXR2	2	0.593446
AKT1S1	2	0.59326
AKR7A5	2	0.593154
2010008C14RIK	2	0.592726
BLZF1	2	0.592433
ALDH5A1	2	0.592386
ASB13	2	0.5922
ALG5	2	0.591967
ATP11A	2	0.591513
ARMC2	2	0.591408
5930403N24RIK	2	0.591058
ALDH1A7	2	0.590957
2600014E21RIK	2	0.590954
AATF	2	0.590812
ASH2L	2	0.590386
ACAP3	2	0.590017
ATP5A1	2	0.589882
4931431B13RIK	2	0.589459
BAG6	2	0.589395
ATP2C2	2	0.58936
ACKR1	2	0.588129
6530402F18RIK	2	0.588113
BCL9	2	0.587799
BCKDHB	2	0.587339
ANKRD27	2	0.587095
AY358078	2	0.586977
AP3S2	2	0.586618
9130208D14RIK	2	0.586264
AMOT	2	0.58624
BCKDK	2	0.586039
1110019D14RIK	2	0.585296
A630001G21RIK	2	0.58514
AMPD2	2	0.585033
ANGEL2	2	0.583293
BCL10	2	0.582999
6030442K20RIK	2	0.582362
ARRB1	2	0.582013
ASPN	2	0.581785
5730419F03RIK	2	0.581732
1700094J05RIK	2	0.581487
ATP1B1	2	0.581305
ALPK3	2	0.58104
ADRA1A	2	0.580825
ADCK2	2	0.580587
AGGF1	2	0.580158
AI597479	2	0.580101
2310026L22RIK	2	0.580075
ARHGAP24	2	0.579675
AACS	2	0.579472
ARHGAP20	2	0.579329
2310001H17RIK	2	0.579143
4933431C10RIK	2	0.579075
2010300C02RIK	2	0.578491
AW046200	2	0.578405
ANKRD37	2	0.578397
ABLIM1	2	0.578358
4930563E22RIK	2	0.577959
ABCG4	2	0.577841
ANK2	2	0.577825
ARHGAP30	2	0.577487
B3GNTL1	2	0.577276
AKT3	2	0.577178
1810041H14RIK	2	0.576838
ANKRD29	2	0.576627
APOPT1	2	0.576341
4930579G24RIK	2	0.576141
1700048M11RIK	2	0.576105
4930519F09RIK	2	0.575911
AI429214	2	0.575744
4930455G09RIK	2	0.575265
2610035D17RIK	2	0.575029
AI987944	2	0.574967
BLOC1S4	2	0.574929
ADCY9	2	0.574916
APC-PS1	2	0.574456
ADAMTS13	2	0.574385
BCKDHA	2	0.574254
4930506C21RIK	2	0.574122
ANK1	2	0.573996
ATP6V1H	2	0.573865
ABCF1	2	0.573776
ALS2CL	2	0.573582
A430035B10RIK	2	0.573359
ARMC6	2	0.573118
2810006K23RIK	2	0.572709
5830432E09RIK	2	0.572558
ARPP19	2	0.572495
5830411N06RIK	2	0.572295
AGPAT4	2	0.572278
ANO1	2	0.572214
BCL2A1B	2	0.57158
ASB16	2	0.571287
5031434O11RIK	2	0.571026
1810034E14RIK	2	0.570989
4833418N02RIK	2	0.570988
AMPD3	2	0.570921
BBS4	2	0.570852
6330403K07RIK	2	0.57051
BCAR1	2	0.570182
ATPIF1	2	0.570139
[truncated: 7,333 more rows]

## Sheet: Renca TCseq
gene	clustergroup	membership score
CASP4	1	0.74347
SERPINA3F	1	0.742463
SERPINA3G	1	0.742428
SERPINA3E-PS	1	0.740946
PARP11	1	0.73832
SERPINA3I	1	0.736328
LY6C1	1	0.735397
GBP11	1	0.733112
SERPINA3H	1	0.732866
GBP5	1	0.731254
CXCL9	1	0.730289
CCND3-PS	1	0.730066
GBP4	1	0.729421
SERPINA3K	1	0.727185
SLFN1	1	0.726914
LY6C2	1	0.726023
UBE2L6	1	0.725804
GBP9	1	0.725767
AIDA	1	0.724141
C1S1	1	0.723967
LAP3	1	0.722371
CYCS	1	0.720202
GM43302	1	0.720133
GM14238	1	0.719543
MS4A8A	1	0.718465
GBP6	1	0.718258
C1S2	1	0.718153
GM10108	1	0.717829
H2-T24	1	0.717634
GM20559	1	0.7176
MSR1	1	0.717487
CSRP1	1	0.716103
TRIM30E-PS1	1	0.715675
IFI44L	1	0.715201
APOL10B	1	0.715154
PLAC8	1	0.714772
GM13772	1	0.714529
MS4A4C	1	0.714431
KLRA2	1	0.713302
LY6E	1	0.71326
PHF11B	1	0.713241
CCL2	1	0.712776
GBP10	1	0.712309
GBP2B	1	0.71186
RMI2	1	0.710782
4930430E12RIK	1	0.709704
PML	1	0.708771
PHF11A	1	0.708635
CCDC86	1	0.707187
CMTR1	1	0.706349
SCO1	1	0.705177
GM11625	1	0.70234
MYD88	1	0.702291
SLFN2	1	0.702228
CCND2	1	0.701729
SECTM1A	1	0.701288
GM14016	1	0.700632
DHX58	1	0.70033
TRIM30A	1	0.69923
MNDAL	1	0.698442
IFI47	1	0.698111
CXCL10	1	0.697784
LY6A	1	0.697746
CCL7	1	0.697396
PTPN9	1	0.697329
RIPK1	1	0.697146
KATNA1	1	0.696928
NUP54	1	0.695905
NT5C3	1	0.695361
SLC25A22	1	0.694991
APOL11B	1	0.69452
NOC4L	1	0.693207
PSMA5	1	0.692432
PHF11C	1	0.692311
SERPINB9	1	0.692053
HERC6	1	0.691956
UPP1	1	0.690746
IL27	1	0.690549
DTX3L	1	0.690492
A730017L22RIK	1	0.689591
SLTM	1	0.688527
TOR1AIP1	1	0.688257
CXCL11	1	0.687972
BATF2	1	0.687936
PSMB2	1	0.687682
ATP11B	1	0.687628
GM15990	1	0.686868
AZI2	1	0.68645
TRIM12A	1	0.686143
RAPGEF2	1	0.685966
MOV10	1	0.68572
IFI206	1	0.685674
IFIT1BL1	1	0.685151
MS4A6D	1	0.684569
TDRKH	1	0.684249
SMAD2	1	0.684219
KARS	1	0.683845
TRIM30D	1	0.683359
PRPF31	1	0.683004
XKR8	1	0.682799
TMEM67	1	0.682334
FPR1	1	0.681772
OTUD1	1	0.680971
ETNK1	1	0.680525
UBA7	1	0.680372
SPPL2A	1	0.679079
DHX58OS	1	0.679054
NMI	1	0.678262
FBXW17	1	0.677431
IDO1	1	0.677176
ASB13	1	0.676416
LARP1	1	0.673903
POMP	1	0.673605
NAA25	1	0.673528
IFI208	1	0.673361
GM12989	1	0.67331
FCGR4	1	0.67243
TGS1	1	0.672224
GBP2	1	0.672192
GK	1	0.671935
APOD	1	0.671026
TRIM34B	1	0.670358
GBP3	1	0.670327
ZFP800	1	0.669636
GM7582	1	0.669205
GM2619	1	0.669054
OLFR56	1	0.668931
GM13252	1	0.668861
CACNA1H	1	0.668829
RAP2C	1	0.668493
IDO2	1	0.667926
PPRC1	1	0.667032
LAIR1	1	0.666905
IFI214	1	0.666456
CHRM3	1	0.665558
SERPINA3L-PS	1	0.664248
OASL1	1	0.663787
TRIM5	1	0.663572
MX1	1	0.662472
FCGR1	1	0.662246
GM10238	1	0.661967
PPP1R15B	1	0.661813
UBE2E1	1	0.660835
EIF5A	1	0.660464
USP7	1	0.660407
PRKX	1	0.660198
IFI27L2A	1	0.660082
RNF114	1	0.660042
ZNFX1	1	0.659776
WT1	1	0.659654
BEND6	1	0.659374
SLC2A6	1	0.658564
RAB5C	1	0.658212
TRIM21	1	0.658012
SCIMP	1	0.657219
GEMIN7	1	0.656938
GM16174	1	0.656104
SAMD9L	1	0.654668
GM13835	1	0.654402
MS4A6C	1	0.654137
PRPF38A	1	0.654037
PSMA7	1	0.653742
GM5970	1	0.653077
CYP2R1	1	0.653017
VWA5A	1	0.652668
HS6ST2	1	0.652425
GM6542	1	0.652186
IFI213	1	0.651552
LPL	1	0.651174
SLC31A2	1	0.650731
BAG1	1	0.650613
4930599N23RIK	1	0.650286
ZC3H7A	1	0.649527
SEC24B	1	0.649476
MAPKAPK2	1	0.649215
TRIM34A	1	0.648924
MED8	1	0.648847
GNPTAB	1	0.648601
TNFRSF1A	1	0.647667
UBD	1	0.647556
RBM19	1	0.646934
GM18342	1	0.646879
IRF7	1	0.646778
C920009B18RIK	1	0.64677
DCP2	1	0.646691
CNIH4	1	0.646482
CD36	1	0.64516
IL6	1	0.64508
TRIM12C	1	0.644763
GM4742	1	0.644655
SUCLG1	1	0.644334
PES1	1	0.644249
SLCO3A1	1	0.643941
GNG12	1	0.643923
CMPK1	1	0.643812
SLC31A1	1	0.643756
RARRES2	1	0.643436
SAMD15	1	0.643138
SNX10	1	0.642896
C1RB	1	0.642796
IFI209	1	0.642366
GM18752	1	0.641948
YRDC	1	0.641926
C1RA	1	0.641059
OLFR753-PS1	1	0.640761
LYAR	1	0.64068
KLRA1	1	0.640315
PSMA4	1	0.639173
PSMC2	1	0.639094
PSMB10	1	0.638913
PSMD3	1	0.638604
BLVRA	1	0.638545
GM7592	1	0.638527
WNT2B	1	0.63791
ATP5O	1	0.637889
APOL10A	1	0.637724
LGALS3BP	1	0.637525
IFITM1	1	0.637242
IFIH1	1	0.637007
PDSS1	1	0.636534
CENPT	1	0.636317
CLIC1	1	0.635918
OLFR810	1	0.635531
PSMA3	1	0.634943
XPNPEP2	1	0.63474
ADAR	1	0.63376
GM18852	1	0.632782
PDE7B	1	0.632195
GM12185	1	0.631844
PROM1	1	0.631672
GM12250	1	0.631348
ECE2	1	0.630973
GM37843	1	0.630734
GM4951	1	0.630419
IFI44	1	0.630293
OGFR	1	0.629836
STAT1	1	0.629834
OLFR92	1	0.62983
GBP7	1	0.62964
CUL2	1	0.629412
GM4117	1	0.628798
NSUN2	1	0.628464
PARP14	1	0.628417
FARSA	1	0.627623
TAP2	1	0.627236
OAS1B	1	0.62713
GM7407	1	0.626431
CFB	1	0.62621
PTBP3	1	0.625985
HDC	1	0.625872
SLC28A2	1	0.625855
RRBP1	1	0.625384
MTHFR	1	0.625337
MILR1	1	0.625239
ALPK1	1	0.624857
COQ5	1	0.624588
IFI203-PS	1	0.624373
A630012P03RIK	1	0.624341
RAB7	1	0.624117
ADAMTS3	1	0.623755
IFI203	1	0.623503
PPIP5K2	1	0.623096
KLK1B11	1	0.622979
PARP9	1	0.622607
SELENOW	1	0.622334
TSPO	1	0.622145
GM7897	1	0.621922
PHC2	1	0.621874
GM15229	1	0.621376
IFI205	1	0.621007
PEAK1OS	1	0.620846
GM43196	1	0.620798
AREL1	1	0.620436
SMCHD1	1	0.620168
GM8953	1	0.619919
U90926	1	0.619733
GM18840	1	0.619624
A530032D15RIK	1	0.618461
GM12253	1	0.617766
SNAP29	1	0.617534
GM4157	1	0.61727
GM28068	1	0.61637
FRMD4A	1	0.616366
DNAJA2	1	0.616262
HK2	1	0.616138
USP42	1	0.614834
RWDD1	1	0.614697
GM44075	1	0.614045
PHF11D	1	0.613792
OLFR54	1	0.613699
BAK1	1	0.613488
FNDC3A	1	0.612806
GM6264	1	0.612752
TIMP3	1	0.612669
TRIM43C	1	0.612635
IL13RA1	1	0.612421
IDH3A	1	0.612287
IGTP	1	0.612236
DCK	1	0.612217
A2M	1	0.611784
MAOB	1	0.61095
SNRPA1	1	0.610837
SLC25A25	1	0.610753
KCNJ15	1	0.610562
SH3RF3	1	0.609741
MRPL51	1	0.60962
MRPL13	1	0.609246
ARL4A	1	0.608705
UBE2F	1	0.608451
SAP30	1	0.608288
SOCS3	1	0.608
C4A	1	0.607839
GM19498	1	0.607721
GM13674	1	0.607658
PSMA1	1	0.607392
RNF213	1	0.607342
UBE2K	1	0.606949
FPR3	1	0.606417
PLCG2	1	0.606387
TRA2B	1	0.605551
GNA13	1	0.605536
LYN	1	0.605471
SERPING1	1	0.605467
GM10109	1	0.604921
PPEF2	1	0.604629
USB1	1	0.604556
GM20470	1	0.60366
SLFN5	1	0.603649
CDV3	1	0.603519
G3BP2	1	0.603186
SELL	1	0.602906
SNHG11	1	0.60289
GM15753	1	0.602441
GM19880	1	0.600416
PSME2B	1	0.600348
KLK1B14-PS	1	0.599672
GATM	1	0.599395
CLNK	1	0.599016
GM11295	1	0.598792
SDC4	1	0.598572
TGTP2	1	0.598015
IFI204	1	0.59794
NUP98	1	0.59783
CSF2	1	0.597641
IRF1	1	0.597345
9930120I10RIK	1	0.597181
NCR1	1	0.596721
PNP	1	0.596211
YWHAE	1	0.595603
MTPN	1	0.595569
STX2	1	0.595331
XAF1	1	0.595226
OLFR809	1	0.595224
E330013P04RIK	1	0.594891
ARF3	1	0.594634
EXOSC3	1	0.594069
KCNAB1	1	0.593536
MILL2	1	0.593441
PSMA6	1	0.593206
AMIGO3	1	0.59285
CACYBP	1	0.592783
C4B	1	0.592645
CYFIP1	1	0.592588
ELMO2	1	0.592244
TGFA	1	0.592232
PLSCR3	1	0.59163
4930512H18RIK	1	0.591407
MRPL3	1	0.591327
SPCS2	1	0.591197
GM15267	1	0.591082
NLRP1A	1	0.590597
NRAS	1	0.590374
CADM3	1	0.58987
GM2427	1	0.589482
TGTP1	1	0.589468
HAVCR1	1	0.588882
PSME2	1	0.588553
GM42549	1	0.588511
IRF9	1	0.58839
TAPBPL	1	0.588133
GM7676	1	0.588037
HNRNPAB	1	0.587082
OASL2	1	0.587022
KLK1	1	0.586943
GM11954	1	0.586595
ELOVL1	1	0.586064
KLK4	1	0.585849
CHMP4B	1	0.585545
HMBOX1	1	0.585156
IFI202B	1	0.585039
ERH	1	0.58476
IRGM1	1	0.584477
PNP2	1	0.583543
IL33	1	0.583522
SLFN4	1	0.583335
VEGFC	1	0.583325
GM8773	1	0.582924
SLC7A11	1	0.582688
PARP12	1	0.582599
AGFG1	1	0.582498
IFT22	1	0.582384
IL18	1	0.581896
SLC25A12	1	0.580838
D13ERTD608E	1	0.580731
TPST1	1	0.580473
SAR1B	1	0.579979
SLAMF9	1	0.579964
SAA1	1	0.579911
TMSB15A	1	0.579729
DDX58	1	0.579506
IFI211	1	0.579188
GFRA1	1	0.578671
GM26621	1	0.578545
GM2147	1	0.578084
GM11787	1	0.577053
UBA1	1	0.575985
KLK1B3	1	0.575714
LINS1	1	0.575277
PLA2G4A	1	0.574941
PSMB6	1	0.574833
EMP3	1	0.574703
TNK1	1	0.574415
PLEKHF2	1	0.574315
ACKR1	1	0.574303
TTC1	1	0.573784
GM7609	1	0.573399
TMEM131	1	0.572976
9430037G07RIK	1	0.572953
C1RL	1	0.572778
HS3ST3A1	1	0.57261
YWHAZ	1	0.572281
G6PDX	1	0.571645
ZBP1	1	0.571182
SMYD5	1	0.570601
CHL1	1	0.5701
THOC6	1	0.570046
HK1	1	0.569857
GM10131	1	0.567085
ZCCHC2	1	0.566893
SAA3	1	0.566541
SECTM1B	1	0.56648
PI16	1	0.566414
KLK1B4	1	0.565841
LY6D	1	0.565792
GM13588	1	0.565304
CD69	1	0.565256
GM5406	1	0.56508
DAXX	1	0.565078
SAMHD1	1	0.56497
N4BP1	1	0.564923
TIMD4	1	0.564783
IRGM2	1	0.564464
CD274	1	0.564425
PFKP	1	0.564355
GM17825	1	0.564172
HTT	1	0.564067
LACC1	1	0.56338
KLK1B5	1	0.562858
GM14017	1	0.562745
CD72	1	0.562689
NCKAP5	1	0.562405
AKT3	1	0.561957
KEAP1	1	0.561607
GLUD-PS	1	0.561473
IFIT3	1	0.561307
HELZ2	1	0.561191
RIPK2	1	0.560946
PRM1	1	0.560832
NAA20	1	0.559998
LAMTOR5	1	0.559996
POLE4	1	0.559981
POU3F1	1	0.559948
PLA2G4C	1	0.559926
ENOPH1	1	0.559917
STK40	1	0.559913
GM8522	1	0.559913
FGL2	1	0.559727
CTRL	1	0.559451
DKC1	1	0.559328
TRAPPC2L	1	0.559327
UNC5A	1	0.55894
SERTAD1	1	0.558933
KLK1B21	1	0.558897
C130026I21RIK	1	0.558743
SMN1	1	0.558653
UBALD2	1	0.558565
TRMT1L	1	0.558475
CLUH	1	0.557867
HS3ST3B1	1	0.557295
KLRB1A	1	0.557067
GM9762	1	0.556796
PSMB8	1	0.556771
SLC39A2	1	0.556753
CANX	1	0.556151
DR1	1	0.55596
GM19248	1	0.555843
ABHD16A	1	0.555828
KLRB1F	1	0.555772
I830077J02RIK	1	0.555644
TMEM128	1	0.555232
NDUFA9	1	0.554318
MSN	1	0.554001
MRPL19	1	0.553975
CTSC	1	0.553835
MEX3C	1	0.553484
MLKL	1	0.553282
GM18445	1	0.553251
GM5711	1	0.553195
GM8242	1	0.553172
SP100	1	0.55311
MRPS18C	1	0.552665
CCDC162	1	0.552212
FOLH1	1	0.552176
VDAC2	1	0.552175
STX3	1	0.552101
NAAA	1	0.551572
RTP4	1	0.551519
TMOD3	1	0.551514
HSPBP1	1	0.551456
IFIT2	1	0.550698
WARS	1	0.550117
GM7478	1	0.550099
TOR3A	1	0.550031
GM16589	1	0.549915
RSAD2	1	0.549496
PARP10	1	0.549474
TRAPPC4	1	0.548909
YBX3	1	0.548765
RHOA	1	0.548563
TRIM30B	1	0.548559
IFRD1	1	0.547735
HAT1	1	0.547699
MPP1	1	0.547465
IFIT3B	1	0.547203
USP18	1	0.547046
KLRA7	1	0.546797
VCP	1	0.546545
ETF1	1	0.546493
AKAP9	1	0.546405
YIPF6	1	0.545559
GM7357	1	0.545222
TRIM26	1	0.545057
LIPE	1	0.544961
LTB4R1	1	0.544816
KLRA8	1	0.544602
C1GALT1C1	1	0.544534
PSMB9	1	0.54396
GM2445	1	0.543515
PHF6	1	0.543146
BMP10	1	0.542926
OAS1A	1	0.542876
SERPINA3N	1	0.542003
FBXO6	1	0.541993
GM13822	1	0.541631
SPCS2-PS	1	0.541333
ACBD3	1	0.540648
DDX60	1	0.540603
RMDN3	1	0.540592
UQCRB	1	0.540455
DDX10	1	0.540037
PTMA	1	0.539864
CCND3	1	0.539716
4921514A10RIK	1	0.539629
MAP2K1	1	0.538998
GM8995	1	0.538902
GM17494	1	0.538694
GM8669	1	0.538687
FOXR1	1	0.538441
NFKBIZ	1	0.53827
SERPINB12	1	0.53785
FADD	1	0.537808
PPT1	1	0.537253
GM18973	1	0.537223
GM9727	1	0.537161
DUSP10	1	0.537161
GM6445	1	0.536967
GM5431	1	0.536762
NUP153	1	0.536336
HNRNPH2	1	0.535639
KLK1B24	1	0.535569
NLRC5	1	0.535399
SERPINA3B	1	0.535246
VPS33A	1	0.535224
GM37975	1	0.535117
IFITM6	1	0.534938
SGCB	1	0.534837
XRN1	1	0.534593
PSMB6-PS2	1	0.534419
IFITM3	1	0.534303
DNAJC21	1	0.534229
ZFP35	1	0.533832
GBP8	1	0.533721
GM29284	1	0.532755
PSMD11	1	0.53268
MED1	1	0.532606
MRPS15	1	0.532573
SERPINB10	1	0.532395
COL17A1	1	0.532342
CASP8	1	0.531783
BTAF1	1	0.531761
GM17228	1	0.531249
KLRA13-PS	1	0.531224
SETDB2	1	0.531184
MIR22HG	1	0.531046
GM10291	1	0.530647
GM5577	1	0.530414
OAS1G	1	0.530179
GM38050	1	0.53008
MVP	1	0.529668
WRN	1	0.529317
ELP5	1	0.529202
ACYP2	1	0.529076
TAPBP	1	0.529051
CD180	1	0.528559
FGF23	1	0.528184
UAP1	1	0.527763
UPB1	1	0.527588
ENOX2	1	0.527322
CTTNBP2	1	0.527265
FCRLA	1	0.527039
STARD3	1	0.526932
DENR	1	0.526793
GM8034	1	0.526245
TDRD7	1	0.526165
TMBIM4	1	0.526133
TNF	1	0.526132
SERPINB1C	1	0.525785
MAJIN	1	0.525695
PSMD10	1	0.525244
FNBP1L	1	0.525107
GM3788	1	0.525089
SNX12	1	0.524986
HK3	1	0.524834
FBXO39	1	0.524822
CEACAM1	1	0.524752
GM8000	1	0.524191
GM10212	1	0.523947
SRSF3	1	0.523451
CCL12	1	0.523391
CCZ1	1	0.523064
5830468F06RIK	1	0.522756
SFXN5	1	0.522599
BLOC1S6	1	0.522569
MAK16	1	0.522408
GLP2R	1	0.522351
TMED3	1	0.521938
GHR	1	0.521486
GM17017	1	0.521456
GM8436	1	0.521447
TAP1	1	0.520825
3110001I22RIK	1	0.520806
RHEB	1	0.52009
HCK	1	0.519615
ADRB3	1	0.51844
GM44227	1	0.51838
GRPEL1	1	0.518377
ERP44	1	0.518135
UBE2N-PS1	1	0.517841
NADK	1	0.517404
ENPP4	1	0.517301
TMEM11	1	0.517085
SLK	1	0.516944
GM19963	1	0.516756
KLRA3	1	0.516397
GM15361	1	0.51599
IFIT1BL2	1	0.51529
UBE2M	1	0.515159
GM5637	1	0.514454
DBNL	1	0.514411
TRIM25	1	0.514091
LIN54	1	0.513868
NRXN3	1	0.513636
VWA3B	1	0.513631
KLRB1-PS1	1	0.513579
MX2	1	0.513402
H2-T23	1	0.512906
DNAH17	1	0.512807
IFI35	1	0.512773
GM16089	1	0.512749
SFMBT1	1	0.512507
NECTIN2	1	0.512505
GM2962	1	0.512186
TVP23A	1	0.512062
KLRB1C	1	0.51174
GM11951	1	0.511319
PLSCR1	1	0.511309
GM1966	1	0.511268
GM12187	1	0.510977
PRSS12	1	0.510313
SPINT1	1	0.509468
MPHOSPH10	1	0.509211
GM4596	1	0.509031
ACKR2	1	0.508267
AK6	1	0.507892
NOTCH1	1	0.507879
ARPC1B	1	0.507772
GM7102	1	0.507275
AIFM3	1	0.506905
GM29371	1	0.506786
PPIA	1	0.50651
IFIT1	1	0.506481
CEACAM2	1	0.506391
CADPS2	1	0.506088
GM12328	1	0.505442
MED28	1	0.505245
TRAF6	1	0.505218
PCBP1	1	0.504956
FZD1	1	0.504882
TNFRSF11A	1	0.504853
TLR13	1	0.504748
VHL-PS1	1	0.504719
GM9844	1	0.503858
TMSB10	1	0.503426
EPHA1	1	0.503085
GM5846	1	0.50268
GM14813	1	0.502675
SEMA7A	1	0.5025
KCMF1	1	0.502015
FAM111A	1	0.501872
RTN4RL2	1	0.501735
RALA	1	0.501384
GM12251	1	0.501364
ABT1	1	0.501289
RTP3	1	0.500772
1700066B19RIK	1	0.500715
TBRG4	1	0.500684
CCDC71L	1	0.500534
MCMBP	1	0.500011
APOBEC4	1	0.499883
NLRP3	1	0.499843
TMEM140	1	0.499815
THUMPD1	1	0.499326
OAS1H	1	0.499152
CHRNB2	1	0.499071
GM11966	1	0.498955
PTHLH	1	0.498699
USP39	1	0.498583
GM43351	1	0.498274
COX7A2	1	0.498146
SLFN8	1	0.498138
COA5	1	0.498122
9430034N14RIK	1	0.498077
SMPDL3B	1	0.497976
VCP-RS	1	0.497784
DNAJB7	1	0.497535
HCN4	1	0.497362
OTUD4	1	0.497271
NUBP1	1	0.496941
STAT3	1	0.496928
SFRP1	1	0.496755
PRMT1	1	0.4967
KLRA9	1	0.496642
GM15821	1	0.496528
EIF4G2	1	0.495192
GOSR2	1	0.49515
TCP10A	1	0.495055
NAPA	1	0.495011
NRXN2	1	0.494859
RXRG	1	0.494468
RBKS	1	0.494154
XPO1	1	0.494139
GM16038	1	0.494028
BRCC3	1	0.493904
GRM8	1	0.493857
ZBTB5	1	0.493115
SLC10A6	1	0.493088
PAQR5	1	0.492907
GM6828	1	0.492731
GM16025	1	0.492438
HCAR2	1	0.492236
PTCRA	1	0.491896
DSG2	1	0.491618
GM20517	1	0.49146
IGFBP3	1	0.491447
SDAD1	1	0.491158
BCCIP	1	0.491103
TMTC1	1	0.490985
SRGAP2	1	0.49095
OAS3	1	0.490493
STXBP3-PS	1	0.490144
SP110	1	0.489692
FAAP24	1	0.489644
PSME1	1	0.489557
PSMG4	1	0.489525
GM16094	1	0.489256
GM7984	1	0.48918
GM11560	1	0.488917
FPR2	1	0.488873
TRIM30C	1	0.488849
AIG1	1	0.488377
MORF4L1	1	0.488143
ADGRB1	1	0.486952
PSMD7	1	0.486722
COX15	1	0.486126
PTX3	1	0.486111
GDA	1	0.486085
CCT7	1	0.486033
FGF10	1	0.485954
GM31026	1	0.485902
GM44389	1	0.48578
TLR2	1	0.48547
GM5828	1	0.485335
THEMIS2	1	0.48495
GM42462	1	0.484836
LGALS9	1	0.484764
PNPLA2	1	0.484671
HP	1	0.484586
KLRA10	1	0.484586
SNCG	1	0.484293
TRIM43A	1	0.484087
PHYH	1	0.483952
GM2389	1	0.483675
PDCD5	1	0.483406
CSRNP1	1	0.483356
ST6GALNAC4	1	0.483344
FANCA	1	0.483127
PTBP1	1	0.482661
TMEM87A	1	0.482566
TMEM30A	1	0.482499
COQ2	1	0.482164
LRRC4	1	0.481835
LGI2	1	0.481745
GM7832	1	0.48173
4933439K11RIK	1	0.48155
SACM1L	1	0.481408
SZRD1	1	0.480969
HEMGN	1	0.480875
SLC25A43	1	0.480849
GFI1B	1	0.48081
ITGA5	1	0.480472
CYP7B1	1	0.480212
GM13812	1	0.47996
GM13831	1	0.479699
PTCH2	1	0.479343
RBMS1	1	0.479275
COL9A3	1	0.478861
RSL24D1	1	0.477965
GM10851	1	0.47763
GM38005	1	0.477546
MUC20	1	0.477481
CRIP3	1	0.47733
KLK1B27	1	0.477102
GM11427	1	0.4771
IGKV1-133	1	0.4763
LSM12	1	0.475714
MAP3K19	1	0.475701
RNF121	1	0.475654
VPS29	1	0.475488
BST2	1	0.475352
GM43214	1	0.475136
CDK14	1	0.475133
GM7030	1	0.474668
IQGAP1	1	0.474227
SPTBN5	1	0.47381
LAPTM4A	1	0.473631
ZNHIT3	1	0.473378
ATP5J2	1	0.472855
RAB27B	1	0.472536
AP1AR	1	0.472536
YWHAG	1	0.472174
ACOD1	1	0.471623
GPR176	1	0.471513
GM15946	1	0.471196
1810037I17RIK	1	0.470838
GM19684	1	0.470746
MUP-PS22	1	0.470576
USO1	1	0.46968
PPP1R26	1	0.469561
KRT83	1	0.469436
PPAN	1	0.469368
MTF1	1	0.468702
TBKBP1	1	0.468528
MXD1	1	0.468481
MED13	1	0.46817
SP140	1	0.46808
SET	1	0.467925
GM11575	1	0.467499
PRLR	1	0.467246
KCNH4	1	0.467194
GM7206	1	0.467008
GM13810	1	0.466836
MRPL21	1	0.466806
CLEC3B	1	0.46674
BE692007	1	0.46637
DDX39	1	0.466278
CEBPD	1	0.466176
DSTN	1	0.465971
GM4759	1	0.465945
GM9917	1	0.46581
MTFR2	1	0.465745
RGS12	1	0.465651
ZDHHC21	1	0.465526
ZCCHC10	1	0.465388
PBDC1	1	0.464664
MUC5AC	1	0.464423
ATP5B	1	0.464377
GSN	1	0.464241
OAS2	1	0.463887
CD300E	1	0.463818
DIAPH2	1	0.46375
OLFR433	1	0.463707
SGK3	1	0.463688
ARHGAP20	1	0.463536
CD177	1	0.463368
MVB12A	1	0.463334
SEC61G	1	0.463269
GM7848	1	0.462968
LRCH3	1	0.462935
TAF7	1	0.462759
GM7839	1	0.462539
GM17149	1	0.462509
LOXL3	1	0.462387
GM12345	1	0.461772
ZBTB7A	1	0.461643
CD40	1	0.461344
GM43912	1	0.461221
ISG20	1	0.461137
GM5525	1	0.460866
ST3GAL5	1	0.460716
MUP5	1	0.460663
EIF3J2	1	0.460458
CORO1C	1	0.460407
ECSCR	1	0.460341
SPOPL	1	0.460039
PDE1A	1	0.459938
ST6GALNAC5	1	0.459472
FHAD1	1	0.459393
GM15427	1	0.459189
USP47	1	0.458764
ALPK2	1	0.458466
GM7776	1	0.458384
ARIH1	1	0.458209
IGHJ1	1	0.45778
HPRT	1	0.457525
IFI27L2B	1	0.45741
ATP8A1	1	0.457365
DENND1A	1	0.457219
KTN1	1	0.456945
UCHL5	1	0.456838
RAI2	1	0.456835
RNF19B	1	0.456768
NXPH3	1	0.456721
TAX1BP1	1	0.456651
GM10123	1	0.456301
RTN4	1	0.45581
BDKRB1	1	0.455503
TCP10B	1	0.455395
TMED5	1	0.455248
GM13768	1	0.454362
SUMO1	1	0.454306
BRD2	1	0.454228
WSB1	1	0.454071
SF3A3	1	0.453878
TOMM40	1	0.453711
MPP6	1	0.453601
HINFP	1	0.453557
CLCN6	1	0.453536
DHX15	1	0.453406
NUDT19	1	0.453253
SLC35A4	1	0.452883
SDCBP	1	0.452563
TNPO3	1	0.452135
OPCML	1	0.451893
GM6728	1	0.451828
SELP	1	0.451501
GM19815	1	0.451496
DUOXA1	1	0.451326
DCUN1D1	1	0.450899
GM17435	1	0.450725
SERPIND1	1	0.450639
PDCD10	1	0.450435
RABGEF1	1	0.449779
GM16286	1	0.44972
SPIB	1	0.449657
ASAP3	1	0.449486
UBE2NL	1	0.448964
BAMBI-PS1	1	0.448838
TMEM243	1	0.448493
PDCD5-PS	1	0.448349
CCR9	1	0.448339
ZBTB7B	1	0.448315
SERTAD3	1	0.448131
U2SURP	1	0.448086
GM14845	1	0.44771
KBTBD11	1	0.447617
MAP2	1	0.447524
AK2	1	0.446603
ADIG	1	0.446428
AP3S1-PS1	1	0.446217
MAGT1	1	0.445976
SYNCRIP	1	0.445741
GM11914	1	0.445725
B2M	1	0.445554
GM18821	1	0.445381
CHST4	1	0.445153
KRT36	1	0.444687
ITGAM	1	0.444684
COQ7	1	0.444664
CD55	1	0.444051
IFI207	1	0.443724
9330159M07RIK	1	0.443712
PPARGC1B	1	0.443701
GM8835	1	0.443499
GM20100	1	0.443451
MYCBP2	1	0.443309
KLRA11-PS	1	0.443092
HIKESHI	1	0.442875
FBL	1	0.442853
TOMM40L	1	0.442554
GM3852	1	0.442541
9430064I24RIK	1	0.442445
GM14928	1	0.442403
RPUSD4	1	0.442386
TRMT44	1	0.442298
SDF2L1	1	0.442177
TMEM29	1	0.442111
UBE2L3	1	0.442002
BCL6	1	0.441726
P2RY13	1	0.441499
DHCR24	1	0.44137
DPYSL2	1	0.440385
PLAUR	1	0.440264
GM6204	1	0.440148
GM7367	1	0.440041
MUP10	1	0.440028
EREG	1	0.439981
DXO	1	0.439776
MANF	1	0.43976
DCUN1D3	1	0.439759
9930022D16RIK	1	0.439746
CERS6	1	0.439611
SMU1	1	0.439474
RPS11-PS1	1	0.439473
TAF13	1	0.438752
FBXW11	1	0.438741
SNRNP27	1	0.438715
ANKFY1	1	0.438558
1600014C10RIK	1	0.438388
SERPINB1B	1	0.438127
GPATCH3	1	0.437026
CTU2	1	0.43689
MRPL55	1	0.436879
HNRNPK	1	0.436291
CHST15	1	0.436288
NUAK2	1	0.436151
TTC39B	1	0.436044
PPA1	1	0.436034
GM9057	1	0.435935
JUN	1	0.435891
SPOP	1	0.435543
UBE2J1	1	0.435425
CHRDL1	1	0.434613
PERM1	1	0.434448
GM16315	1	0.434447
RET	1	0.434069
TLL1	1	0.434005
GM6501	1	0.43396
CHCHD3	1	0.433749
FAM217B	1	0.433695
GM12216	1	0.433495
GM4972	1	0.433023
BC085271	1	0.432703
GM20429	1	0.432645
PNPT1	1	0.43257
KCNH1	1	0.432454
GM20519	1	0.43224
GM12969	1	0.432119
GM4070	1	0.43189
HNRNPF	1	0.431792
NOX1	1	0.431724
RETN	1	0.431709
GM12844	1	0.431159
UBE2D3	1	0.431153
PPP2CA	1	0.431086
F830208F22RIK	1	0.430827
GM12892	1	0.430764
AMY1	1	0.430236
HTRA4	1	0.430027
IRAK2	1	0.430025
F730311O21RIK	1	0.429956
2700029L08RIK	1	0.429754
TEX10	1	0.429674
DNAJB5	1	0.429241
SH2D1B2	1	0.429128
UXT	1	0.428741
ENTPD2	1	0.428546
GM10015	1	0.428325
GM45418	1	0.428054
GM6060	1	0.42754
STX18	1	0.427511
NAA15	1	0.42706
RPL30-PS10	1	0.426882
RNPEPL1	1	0.426553
IGHM	1	0.426473
GM43633	1	0.426451
TLN1	1	0.426307
TMCC3	1	0.426003
DGKG	1	0.425948
KLHDC4	1	0.42589
SNX1	1	0.425686
ADORA2B	1	0.425625
LITAF	1	0.42553
ALDH1L1	1	0.425454
WFDC21	1	0.425199
RAB1A	1	0.425124
DNA2	1	0.425109
PLEKHM3	1	0.425024
GVIN1	1	0.42495
SVEP1	1	0.424623
GM10182	1	0.424417
ANKRD49	1	0.424188
PHACTR3	1	0.424177
ZCRB1	1	0.423754
E130102H24RIK	1	0.423632
GM13461	1	0.423293
IL6ST	1	0.423278
PTGS2OS2	1	0.423166
FAM89B	1	0.423164
OLFR1033	1	0.423144
YBX1-PS2	1	0.423108
TMEM167	1	0.42279
PLPP3	1	0.42273
UQCR11	1	0.422585
RNF31	1	0.42249
GM6610	1	0.422319
GLS	1	0.422295
GNL1	1	0.42227
HIBADH	1	0.422263
GPR33	1	0.422198
GGCT	1	0.421968
NUDT3	1	0.421821
RAP1GAP2	1	0.421708
CMTM6	1	0.421671
GM42547	1	0.421461
ITPRIPL1	1	0.42143
ARHGAP8	1	0.421293
CPNE3	1	0.421095
GLA	1	0.420995
G530011O06RIK	1	0.420863
GM10167	1	0.420775
LGALS8	1	0.420617
ERLIN1	1	0.420456
GM12424	1	0.419988
PSMC4	1	0.418908
GM12504	1	0.418505
BAZ1A	1	0.418285
ATF6B	1	0.41807
GM6034	1	0.417791
NME1	1	0.417514
RAB12	1	0.417503
CRKL	1	0.417472
GM10552	1	0.417445
PRSS46	1	0.417443
NDUFV2	1	0.417435
CCDC36	1	0.416844
DLAT	1	0.416829
ALDH1A3	1	0.416821
EYA1	1	0.416723
FURIN	1	0.416617
KLRA4	1	0.416492
OLFR756-PS1	1	0.415951
HSD11B1	1	0.415602
ADGRV1	1	0.415582
EDEM1	1	0.415548
INPP5B	1	0.415424
CCL21A	1	0.415301
ATP6V1E1	1	0.415109
KCTD3	1	0.414975
TCERG1	1	0.414626
GM8980	1	0.414607
ACLY	1	0.414274
9930111J21RIK2	1	0.414213
RABGGTB	1	0.413416
PGD	1	0.413307
CCT6A	1	0.413267
CXCL5	1	0.41293
SLC25A1	1	0.412803
TMEM50B	1	0.41263
MITD1	1	0.412625
FHL3	1	0.412539
KPNA4	1	0.411491
CACNA1F	1	0.411041
SPATA5L1	1	0.410981
NHP2	1	0.410956
GM5960	1	0.410695
GM8989	1	0.410691
EBNA1BP2	1	0.410671
GPR85	1	0.410396
TNPO1	1	0.410267
PYCARD	1	0.410116
SDHC	1	0.409545
MUP6	1	0.408857
GM13304	1	0.408849
DENND1B	1	0.408556
GM5558	1	0.408383
GM17782	1	0.408164
GM6063	1	0.408128
COX6A1	1	0.407947
GPRC5B	1	0.407876
COPE	1	0.407859
CHRNA5	1	0.407851
PRDX5	1	0.40745
HS3ST1	1	0.407339
FMR1	1	0.407144
GM15283	1	0.40705
PIM1	1	0.406959
PLEKHG6	1	0.406954
GM14173	1	0.406763
KLRI2	1	0.406057
SENP3	1	0.406049
MAP2K4	1	0.405938
CDKN2D	1	0.405905
UBE2D1	1	0.405738
IL12RB1	1	0.405665
MFSD1	1	0.405586
MORC3	1	0.405542
XIAP	1	0.405273
GM11689	1	0.405247
NECTIN4	1	0.404744
PA2G4	1	0.404404
PITPNA	1	0.404368
BTNL2	1	0.404032
GM19719	1	0.403933
GM8260	1	0.403878
IL1RL1	1	0.402989
RNF34	1	0.402843
SPINK2	1	0.402809
NUP93	1	0.402706
SLC11A2	1	0.402544
GM12693	1	0.402408
SASS6	1	0.40226
RPS27L	1	0.402153
CEBPB	1	0.401799
ZBTB49	1	0.401601
FEN1	1	0.401395
GM16092	1	0.401338
GLUD1	1	0.401333
EIF3J1	1	0.401127
GM13500	1	0.401051
GM7879	1	0.400921
SHB	1	0.400897
STYK1	1	0.400593
MRAP	1	0.400511
CAPN12	1	0.400493
IER3	1	0.400471
IGKV6-20	1	0.400416
GM11957	1	0.400408
GNAI3	1	0.400193
FJX1	1	0.40015
GM6211	1	0.399924
EPB41L4B	1	0.3999
GABRA3	1	0.399756
GM6011	1	0.399466
ATF3	1	0.399363
IL23R	1	0.399279
MAFK	1	0.399089
IL4RA	1	0.398672
NECAP1	1	0.398452
DUSP22	1	0.398396
6530409C15RIK	1	0.398311
WDFY4	1	0.398264
2310040G24RIK	1	0.398156
GNAQ	1	0.397637
LSM1	1	0.397604
NLRP1B	1	0.397386
IGKV6-29	1	0.396835
CDC42	1	0.39672
SLFN5OS	1	0.396519
GM12870	1	0.396107
CCNL2	1	0.395699
SIGLEC1	1	0.395307
GM11930	1	0.395239
GM11626	1	0.394971
GM5430	1	0.394817
ATP6AP1	1	0.394747
TPPP3	1	0.394689
INPP1	1	0.394332
CHMP2A	1	0.394272
NDUFB6	1	0.394074
BLCAP	1	0.394069
RND1	1	0.393906
MUP14	1	0.393791
GM12492	1	0.393624
USP50	1	0.393617
DUOX1	1	0.393551
GM7150	1	0.393241
REXO2	1	0.393205
GM45113	1	0.392973
MUP2	1	0.39278
DDX31	1	0.392613
SMURF1	1	0.392326
A530040E14RIK	1	0.392314
VIM	1	0.392162
NDUFAB1	1	0.392065
ATP5J	1	0.392043
GM14108	1	0.391748
CD55B	1	0.391729
BCL11A	1	0.391659
PKM	1	0.391404
GM45221	1	0.391255
THOC5	1	0.391154
KLRI1	1	0.390805
MUP13	1	0.390733
ACER2	1	0.390553
PPP1R21	1	0.390431
TAF9	1	0.390237
NUP210L	1	0.390101
NAP1L2	1	0.390098
SELE	1	0.38982
GM19587	1	0.389819
PLIN1	1	0.389794
MUP16	1	0.389789
XBP1	1	0.389596
SIGLECH	1	0.389578
GM6659	1	0.389494
GM6855	1	0.389185
GM12722	1	0.389152
MOB3B	1	0.388849
GM5254	1	0.388758
OLFR755-PS1	1	0.388742
SLC35C1	1	0.388575
MRPS22	1	0.388553
MDH1	1	0.388415
GM10420	1	0.38838
ARHGEF10	1	0.388012
AP1M2	1	0.387847
AKIRIN1-PS	1	0.387675
RNF4	1	0.387476
NDUFS7	1	0.387475
FAM83C	1	0.386937
RALY	1	0.386789
KRI1	1	0.38657
COL6A4	1	0.385959
GM44986	1	0.385436
CCNH	1	0.385341
HPS3	1	0.385294
GM20612	1	0.385236
CCDC171	1	0.384406
ETOHD2	1	0.384267
TRBJ1-1	1	0.38419
SRA1	1	0.384093
TMEM68	1	0.38399
RBM26	1	0.383392
GM12735	1	0.383351
GJB2	1	0.383069
MUP7	1	0.382665
RPS19-PS12	1	0.382656
IGKV14-100	1	0.382578
9330182L06RIK	1	0.382249
TRPC3	1	0.381909
COX18	1	0.381755
RBMX2	1	0.381638
FGF7	1	0.381295
PSMD8	1	0.380798
GM5867	1	0.380752
CHUK	1	0.380679
MS4A4D	1	0.380666
ELAC2	1	0.3806
GM11964	1	0.380588
B3GALT2	1	0.380249
GM42764	1	0.380198
PRDX3	1	0.379984
LHX2	1	0.379972
ABHD13	1	0.379716
ACKR3	1	0.379553
GM43197	1	0.379539
GM17910	1	0.379321
SYVN1	1	0.379133
SLFN3	1	0.379083
HIPK2	1	0.37908
GM8146	1	0.378981
ATP5K-PS2	1	0.378939
ANKS1	1	0.378534
C1QBP	1	0.378526
MUP17	1	0.37848
LRRC40	1	0.378413
PDCD6IP	1	0.378306
YTHDF2	1	0.378275
EIF4E2	1	0.378041
PPME1	1	0.377734
MAT2A	1	0.377605
SPON2	1	0.377259
FAM214B	1	0.376848
NIP7	1	0.376791
GM13770	1	0.376761
GM9530	1	0.376448
GM10357	1	0.376372
9130401M01RIK	1	0.375972
GPBP1	1	0.375843
GM6069	1	0.375716
KCND3	1	0.375697
TMOD2	1	0.375565
TACSTD2	1	0.375403
CREB3	1	0.375343
TBCB	1	0.375336
GM20768	1	0.374766
DNAJB1	1	0.374509
NOX4	1	0.374149
TPH1	1	0.374128
BC055308	1	0.373908
E330020D12RIK	1	0.373734
HSPE1-PS2	1	0.373629
4930570G19RIK	1	0.373469
DBR1	1	0.373391
GM13743	1	0.37318
PDCD2L	1	0.372959
SH3BGRL	1	0.372852
PNO1	1	0.372826
MAP2K3	1	0.372575
SLC22A13	1	0.372191
SLIRP	1	0.372033
CAML	1	0.372028
GM9009	1	0.372001
1700001L05RIK	1	0.371566
FMC1	1	0.371431
GM13722	1	0.370506
PLA2R1	1	0.37015
IGKV14-111	1	0.370138
PHRF1	1	0.370027
NEGR1	1	0.369757
PPP1R3D	1	0.369589
EIF5B	1	0.369488
GM6227	1	0.369454
OCLN	1	0.369165
MUP-PS13	1	0.369145
SLC6A19	1	0.368932
FAM78B	1	0.368901
CYP8B1	1	0.368633
SEC11A	1	0.368568
CDHR4	1	0.368519
FUNDC1	1	0.368511
GAS7	1	0.367976
OCSTAMP	1	0.367583
IGFBP5	1	0.367255
GM5913	1	0.367086
TAGLN2	1	0.366857
ALDH1A7	1	0.366792
TLR7	1	0.366775
GM9013	1	0.366717
SNTG2	1	0.366665
GM16425	1	0.366256
UBE2J2	1	0.366042
MIS12	1	0.365839
ITPR1	1	0.365541
GM10069	1	0.365504
GM14200	1	0.365467
GM9761	1	0.365214
SH3GLB1	1	0.364701
GM9531	1	0.364477
GM44974	1	0.364324
APOL6	1	0.364256
1700025G04RIK	1	0.363836
GM7804	1	0.363806
CCDC146	1	0.363747
YTHDC2	1	0.363649
GM13713	1	0.363626
MLF1	1	0.363437
CXCL3	1	0.363259
DDX51	1	0.36281
ADAM33	1	0.362766
USPL1	1	0.362734
PTGES	1	0.36264
GM5297	1	0.362357
OPN3	1	0.362356
C8A	1	0.362291
ELAVL1	1	0.36228
SHISA6	1	0.361174
AP1G1	1	0.361096
PLET1	1	0.360972
GM6368	1	0.360939
EIF2AK2	1	0.360678
GM5940	1	0.360561
MTHFR-PS1	1	0.360491
FAM209	1	0.36019
GTPBP2	1	0.360185
SLC4A4	1	0.359805
SMG1	1	0.359703
GM12728	1	0.359645
RBM3OS	1	0.359528
GM7117	1	0.35932
HMGCR	1	0.359204
GM15344	1	0.359102
DPAGT1	1	0.358806
GM44851	1	0.35842
GM12664	1	0.358139
GM7492	1	0.357994
OLFR98	1	0.357749
GM7241	1	0.357414
GM42528	1	0.357259
BCAP31	1	0.357023
PRG4	1	0.356657
GM2308	1	0.356422
MFSD14B	1	0.35593
KLRA17	1	0.355834
KRT19	1	0.355657
SAMD4B	1	0.355546
SKIL	1	0.35538
SLIT2	1	0.355359
SLFN10-PS	1	0.355335
GM16364	1	0.355334
INTS5	1	0.354889
PARL	1	0.354815
GM14636	1	0.354787
SULF1	1	0.354683
LEO1	1	0.354562
CDC40	1	0.35453
PHLDA1	1	0.354527
IMPG2	1	0.354187
NDUFA3	1	0.354102
HCAR1	1	0.3538
ASB11	1	0.353647
SDK1	1	0.353587
DTX2	1	0.353397
GM14554	1	0.353037
GTF2B	1	0.352952
AP3S1-PS2	1	0.352928
KMO	1	0.3529
OLFM1	1	0.352761
CDH22	1	0.352741
ERCC8	1	0.352617
DYNLT1-PS1	1	0.352514
IGLC3	1	0.352242
METTL21C	1	0.351755
OLFR1396	1	0.351705
PARP3	1	0.351599
CLIP1	1	0.351542
COL28A1	1	0.351451
GM20186	1	0.351438
MOSPD2	1	0.351218
GM15502	1	0.35096
MOB1B	1	0.350795
GM13360	1	0.350523
CDKL3	1	0.350127
GM16148	1	0.349991
GM33370	1	0.349973
ADORA1	1	0.349957
CWC27	1	0.34994
TRMO	1	0.349921
GM43272	1	0.34932
2510039O18RIK	1	0.349264
ZFP711	1	0.349104
GM14639	1	0.349069
LCAT	1	0.349017
CSF1	1	0.34842
D17H6S53E	1	0.348193
KCNC1	1	0.347569
GM7118	1	0.346973
CHIL3	1	0.346747
ORC1	1	0.346565
TM7SF2	1	0.345968
TLR3	1	0.345936
GM5844	1	0.344993
MTERF3	1	0.344746
GM14277	1	0.344741
UGCG	1	0.344694
GRM6	1	0.344364
GM8979	1	0.344279
PSME3	1	0.344272
GM12697	1	0.34406
GM15707	1	0.343945
ALOX12	1	0.343669
CARMIL1	1	0.343601
TM6SF1	1	0.343391
CNNM4	1	0.342987
PDGFRA	1	0.342797
GM4017	1	0.342772
RCC1	1	0.342664
AEN	1	0.342531
RAN	1	0.341982
MRGPRB1	1	0.341922
GM18853	1	0.341847
GM9836	1	0.341391
KRTAP16-3	1	0.341288
MED29	1	0.341121
GM29138	1	0.340655
BLOC1S4	1	0.339899
GM7251	1	0.339887
TMEM45B	1	0.33987
NCL	1	0.339784
CD44	1	0.339513
TIPRL	1	0.339264
GM7199	1	0.339104
DNAH7C	1	0.339089
FBLN7	1	0.338824
YPEL4	1	0.338574
ZNRD1	1	0.338492
GM12188	1	0.338288
GM26797	1	0.33814
SH2D1B1	1	0.338099
MALSU1	1	0.337987
SNX17	1	0.33772
CHRNE	1	0.337633
TPPP	1	0.337505
GM19503	1	0.337355
5031439G07RIK	1	0.336861
COPG2	1	0.33672
TPD52-PS	1	0.336602
MYBBP1A	1	0.336122
GM13652	1	0.336023
LNX1	1	0.335826
SPOUT1	1	0.335814
GM2077	1	0.33575
GM9234	1	0.335653
DDX3X	1	0.335643
ADM	1	0.335301
RER1	1	0.335134
CDK12	1	0.334723
GM5863	1	0.334303
C430002N11RIK	1	0.334188
BCL9	1	0.334136
CYP2F2	1	0.333616
SNHG14	1	0.333583
DHX33	1	0.33343
POU2F2	1	0.333073
KDM5C	1	0.333069
TCHH	1	0.332935
FZD5	1	0.332822
ANK1	1	0.332451
TRA2A	1	0.332431
GM5987	1	0.332341
KRT16	1	0.332105
CABYR	1	0.332089
CAPN9	1	0.331946
IGKV17-121	1	0.331855
BMPER	1	0.331605
SNRPA	1	0.331314
MAN2A1	1	0.331164
TUBB3	1	0.330953
GM6377	1	0.330772
TREM1	1	0.330382
C230035I16RIK	1	0.330218
LHX6	1	0.330177
ZFP804A	1	0.330131
GM4270	1	0.330075
4930513N10RIK	1	0.329707
UGT8A	1	0.329529
LRRC42	1	0.329372
GPAT2	1	0.329275
GM16230	1	0.32896
CES1D	1	0.328799
GPN1	1	0.32805
GM43181	1	0.327954
TARBP2	1	0.327818
NDUFV1	1	0.327606
GM13719	1	0.327552
SIX1	1	0.327534
GM45059	1	0.327448
SLC39A1-PS	1	0.327322
F730043M19RIK	1	0.327308
EP400	1	0.327203
TCHHL1	1	0.326963
COX10	1	0.326085
GM16265	1	0.325828
CHIL4	1	0.325681
A3GALT2	1	0.325422
GM37486	1	0.325074
GM14227	1	0.324869
GAS2L1	1	0.324743
NAALADL2	1	0.324689
PLEKHA4	1	0.324424
GM4374	1	0.324354
NSUN4	1	0.324221
MSTN	1	0.32419
B3GNT2	1	0.32401
GM15701	1	0.323983
GM5662	1	0.323981
BCO2	1	0.323845
CGGBP1	1	0.323649
GM13234	1	0.323544
UBC	1	0.323364
IFITM2	1	0.32331
GATA2	1	0.323262
GM14830	1	0.323015
GM11562	1	0.322948
GM10364	1	0.322891
5830411N06RIK	1	0.322772
GM16368	1	0.322652
1700028J19RIK	1	0.322649
ARL5B	1	0.322571
GREB1L	1	0.322543
ALDH1A2	1	0.322341
GM11249	1	0.322335
POLR2I	1	0.322307
GM37296	1	0.322141
GM11814	1	0.32192
GM16156	1	0.321839
ZFP143	1	0.321547
GM13365	1	0.321462
1110025L11RIK	1	0.321397
TMBIM6	1	0.321086
LEP	1	0.320532
GM15726	1	0.320416
GM11563	1	0.320223
LDHA-PS2	1	0.319942
GM12419	1	0.319904
GM11628	1	0.319862
PIN1	1	0.319679
SIPA1L3	1	0.319456
NRIP1	1	0.319128
NDUFA2	1	0.319055
UBFD1	1	0.318693
GM43719	1	0.318659
PAMR1	1	0.318652
LDLRAP1	1	0.318574
MFSD14A	1	0.318573
GM37893	1	0.318552
GM3348	1	0.318499
GM3170	1	0.318444
GM10080	1	0.318388
GM12917	1	0.318282
GM10143	1	0.318132
TBC1D1	1	0.318089
C3AR1	1	0.31798
TMEM198B	1	0.317955
C1QTNF7	1	0.317525
GM17193	1	0.317202
AREG	1	0.316974
MPZ	1	0.316845
ZFP809	1	0.316634
GM5578	1	0.31644
1700126G02RIK	1	0.316316
GM12205	1	0.316305
UTP23	1	0.316303
GM38228	1	0.316188
RBM14	1	0.315502
GM6510	1	0.315285
CAPNS2	1	0.314791
HOMER1	1	0.314704
BACH1	1	0.314506
KRTAP1-5	1	0.314437
PLAC9A	1	0.314052
GM12312	1	0.31379
G6PD2	1	0.31376
GM7931	1	0.313749
GM11559	1	0.31371
AWAT2	1	0.313501
CALCB	1	0.31326
RWDD4A	1	0.313232
KRTAP14	1	0.313175
MIR9-3HG	1	0.313162
HMGN3	1	0.313115
CCNC	1	0.313105
NOCT	1	0.313092
GM8069	1	0.313064
PLAC9B	1	0.312996
TMEFF2	1	0.312922
GM4518	1	0.312908
KRTAP4-1	1	0.312768
GM11937	1	0.31258
KRTAP6-2	1	0.312544
MS4A2	1	0.312411
GM10179	1	0.312296
ARHGAP44	1	0.312271
TIMM10	1	0.31192
HSF2BP	1	0.311891
GM17121	1	0.311851
KRTAP15	1	0.311684
RBM6-PS2	1	0.311482
KBTBD8	1	0.31145
GM42559	1	0.311235
PINLYP	1	0.311208
PEX5L	1	0.311127
GM44423	1	0.311005
COX5B	1	0.310939
MEGF11	1	0.310802
BRWD3	1	0.310658
KRTAP9-1	1	0.310636
ADORA3	1	0.310371
KRTAP16-1	1	0.31033
PPP2R2D	1	0.310023
GM4553	1	0.309381
LGALS12	1	0.309365
ESRP1	1	0.309338
CD200R3	1	0.309308
SNRNP35	1	0.308888
GM11767	1	0.308664
SCN3B	1	0.308338
ZBTB18	1	0.308283
SLC9A2	1	0.308017
KRT26	1	0.30796
CCL17	1	0.307714
KRTAP3-1	1	0.307613
GM42430	1	0.307586
PLEKHG2	1	0.307535
SLC17A7	1	0.307439
GM17837	1	0.307127
GM8587	1	0.307017
GM42595	1	0.306769
GM13091	1	0.306697
GM5224	1	0.306576
GM9780	1	0.306327
CLDND1	1	0.306153
SCUBE3	1	0.305695
MRPL37	1	0.305352
GM17046	1	0.304755
IGKV1-131	1	0.304648
KRTAP4-7	1	0.304645
KRTAP11-1	1	0.304585
GM16465	1	0.304357
LCN2	1	0.304054
ERCC6L	1	0.303431
LLPH	1	0.303399
GM13767	1	0.303334
DDA1	1	0.302895
RPL19-PS1	1	0.302616
COL5A3	1	0.302591
PDCL3	1	0.302105
4933417G07RIK	1	0.302096
PHACTR4	1	0.301903
PHACTR1	1	0.301879
KRT33A	1	0.301841
CYGB	1	0.301614
SHF	1	0.301576
FLOT1	1	0.301575
TCP11L1	1	0.301411
GM5356	1	0.301369
GM10154	1	0.301367
GM12403	1	0.301321
GM11567	1	0.30116
IPO7	1	0.301114
GM5776	1	0.300884
AFG3L1	1	0.300879
ATP8A2	1	0.300739
KRTAP28-10	1	0.300581
MET	1	0.300363
KRT34	1	0.300351
GM37352	1	0.300277
IGHV1-77	1	0.300022
RC3H1	1	0.300008
ANGPT2	1	0.299955
CHPF2	1	0.299911
ADIPOQ	1	0.299633
GM12684	1	0.299624
GM11568	1	0.299572
INPPL1	1	0.299488
PGAM5	1	0.298415
ALDH1A1	1	0.297858
NDUFA4	1	0.297858
GM4540	1	0.297574
OLFR97	1	0.297429
9930111J21RIK1	1	0.297157
GNB2	1	0.297048
NFYA	1	0.297043
B230307C23RIK	1	0.296942
A030005K14RIK	1	0.296866
GM6522	1	0.296761
GM45308	1	0.296698
GPRC5D	1	0.296475
GM12626	1	0.295947
CENPJ	1	0.295872
AZIN2	1	0.29514
KRT31	1	0.294823
JUNOS	1	0.294692
KRTAP3-3	1	0.294362
GM9027	1	0.29419
KRT33B	1	0.294093
FAM107A	1	0.29377
KRTAP9-3	1	0.293499
NCCRP1	1	0.293478
KRT35	1	0.293436
CIDEC	1	0.293309
GM20518	1	0.293167
MIR99AHG	1	0.293155
B4GALT3	1	0.293152
GM10254	1	0.293013
0610039K10RIK	1	0.292861
MAP2K3OS	1	0.292794
IGKV1-135	1	0.292767
GM11938	1	0.292466
GIPC1	1	0.291967
GM15190	1	0.291499
GM16478	1	0.291405
PTPA	1	0.291323
TXLNA	1	0.291166
GM12264	1	0.29106
CEP152	1	0.290726
SLC39A1	1	0.29055
ZFP366	1	0.290383
CCDC167	1	0.290289
EAPP	1	0.289566
INO80D	1	0.289509
TUBA1A	1	0.289146
GM13624	1	0.289008
PDZD4	1	0.288796
GM7146	1	0.28878
ESD	1	0.288749
HNRNPM	1	0.288665
NDUFB2	1	0.28861
PSMB3	1	0.288589
GM8254	1	0.288391
GM13919	1	0.288382
TCEA3	1	0.288315
COA7	1	0.288042
GM5915	1	0.287961
KRTAP3-2	1	0.287792
PDP1	1	0.287637
KRTAP2-4	1	0.287597
SPRR1A	1	0.287436
SBK3	1	0.286396
GM4707	1	0.286291
ZFP518B	1	0.286224
ZNHIT1	1	0.286055
THRSP	1	0.285865
IGHV1-14	1	0.285769
BROX	1	0.285685
TMEM233	1	0.285649
PITPNM3	1	0.285477
TBX5	1	0.285209
GM37833	1	0.284956
TGM2	1	0.284879
KRT32	1	0.284597
ATP6V0E2	1	0.284474
KRT75	1	0.284466
GM5853	1	0.283811
GM7805	1	0.283739
GM43068	1	0.28368
GM45014	1	0.283494
NDUFS6	1	0.282733
OSMR	1	0.282625
GM17222	1	0.282453
FXYD1	1	0.282173
GM9869	1	0.28215
COX6A2	1	0.28213
PGS1	1	0.282105
1700128F08RIK	1	0.281804
HPGD	1	0.281652
RRAS	1	0.281643
1110038B12RIK	1	0.281641
TUBA1B	1	0.281615
FAM45A	1	0.281615
BARX2	1	0.281168
KRT73	1	0.280772
WNT2	1	0.280512
POC1A	1	0.280467
FER1L6	1	0.280282
3300002P13RIK	1	0.280178
GM17048	1	0.280088
ARXES2	1	0.280038
EIF4A1	1	0.279981
ZDHHC13	1	0.27938
PRR9	1	0.279353
TRMT6	1	0.279272
CLCN1	1	0.27918
GTPBP3	1	0.278853
SAP18B	1	0.278598
RPL22L1	1	0.278273
9130208D14RIK	1	0.278067
GM17045	1	0.277768
GM37780	1	0.277703
GM14150	1	0.277684
PPIG	1	0.277667
RYBP	1	0.277652
SF3A2	1	0.277636
KCNMA1	1	0.277584
ZFP750	1	0.277057
GM7561	1	0.277033
KRT72	1	0.276755
SMYD1	1	0.276682
TNFSF18	1	0.276404
SKIV2L-PS1	1	0.276391
CRNN	1	0.2762
9530056K15RIK	1	0.276181
SYS1	1	0.276105
GM11945	1	0.276053
TGM6	1	0.275999
GM6823	1	0.275581
GM13127	1	0.275465
RASGRF1	1	0.275375
NOL6	1	0.275278
EIF4A-PS4	1	0.275113
CAR3	1	0.274987
GM8401	1	0.274964
LRRFIP1	1	0.274902
GM12335	1	0.274886
TYRP1	1	0.274851
REM1	1	0.274456
GMPPB	1	0.274357
LYVE1	1	0.274309
TIMP4	1	0.274247
HCFC1	1	0.274153
NUGGC	1	0.274105
GM18284	1	0.273967
LYG2	1	0.273436
INHBB	1	0.273375
UBE2S	1	0.273374
GM12502	1	0.27318
PVALB	1	0.273175
HSPE1	1	0.273096
GM15790	1	0.273083
1520401A03RIK	1	0.272879
EDF1	1	0.272826
CILP	1	0.27282
SERPINE1	1	0.272654
GM9134	1	0.272644
GM12758	1	0.272372
VWF	1	0.27231
GM7572	1	0.272292
GM13315	1	0.272286
RELN	1	0.272016
[truncated: 14,818 more rows]
