# Supplementary material for: Temporally restricted activation of IFNβ signaling determines response to immune checkpoint therapy
Source: Research Square preprint supplement (doi:10.21203/rs.3.rs-892399/v1), 2021-09-24
Supplement: Supplementary file 3 [file 50363e6ec4c01ed5d4edd16c.xlsx]

## Sheet: Stimulated_T_Cel
NAME	IFNB	Resting	Th17	Th2	Th1	Th0	iTreg
A2M	16.4819	307.087	10.4406	10.8238	7.59778	11.1509	9.80028
ABCC3	3.77247	163.276	6.4458	3.6853	4.84448	4.92537	6.30608
ADAMDEC1	6.7225	233.182	4.56039	2.936	4.34878	3.88929	4.69701
ADAMTS7P1	4.76983	160.245	4.86814	4.79501	4.70587	4.64357	5.8811
ALPK2	56.6778	39.5419	582.581	103.97	202.198	119.878	292.495
ANXA10	17.9572	1.26792	3.12964	2.07541	3.37839	2.24703	3.04957
ANXA3	87.3832	25.4207	16.9531	21.5442	133.07	57.2109	36.2411
ANXA8	2.43284	1.11015	1	19.781	1	2.26083	1
ART3	211.869	2.67873	25.4049	18.4917	30.3712	37.0008	36.0316
ASCL1	3.53601	1.22276	98.8827	3.96294	5.94875	7.53773	25.915
ATP6V0A4	8.59691	1	456.913	8.52675	29.8298	5.12663	20.2656
ATP6V0D2	1	75.7686	1.11696	1	1	1.34307	1
BARX2	6.43524	3.32324	192.548	24.4513	20.3071	11.7564	86.2658
BCAR3	134.545	44.547	835.72	255.321	59.1925	84.3425	302.73
BCL2L14	1594.75	10.1339	230.496	197.243	441.741	384.794	356.278
C10orf67	19.7165	4.06128	90.1446	7.14958	35.6882	34.9101	90.3066
C16orf74	3.35145	133.395	6.91508	3.77247	5.06555	3.21526	3.55774
CACNA1I	87.8461	4463.8	116.04	102.322	79.3884	106.77	62.6788
CALD1	137.379	25.1519	192.971	689.919	89.8999	120.969	162.082
CCL17	17.5376	2.63851	15.8914	69.4446	51.5903	87.6104	85.8971
CCL20	227.226	16.9627	1021.9	142.609	243.535	215.738	742.813
CCR1	1145.19	518.977	23.8388	20.1737	232.032	177.305	76.1438
CD163	2.26083	326.123	2.3201	1.59131	1.47635	2.36048	2.59704
CD38	8172.23	179.31	782.12	2156.85	3279.68	2484.54	2401.67
CES1	3.62117	946.951	3.18188	2.28042	2.04655	2.29027	1.93624
CHST3	35.3237	2.53435	183.973	60.9298	49.9097	53.387	294.233
CLDN1	76.3457	1	54.6591	129.056	109.613	64.0062	82.8575
CLDN5	3.51685	1.52365	3.86071	18.273	4.45471	6.77836	4.31234
CLEC17A	16.8011	15.5944	197.87	24.8655	18.5635	25.002	117.652
CMKLR1	2.73753	94.9179	1	1	1.72622	1.95271	2.52974
CMPK2	8725.68	128.573	1824.15	909.749	3045.99	1798.45	2038.51
COL15A1	15.8828	2.44502	139.882	14.1924	18.8949	14.9663	71.5396
COL6A3	922.237	204.899	5015.67	1809.86	608.902	1396.29	3598.53
CRH	1	1	1	25.3121	1	1	1
CTSLP3	1.01486	1.96357	1.01486	30.3373	1.0074	1.0074	1.0037
CXCL10	11983.1	4.9321	813.155	330.919	1046.24	821.062	1197.48
CXCL11	2041.68	1.82284	78.0759	51.2071	169.366	140.524	199.001
CXCL12	4.22106	1	18.1664	1.98421	4.63496	2.10889	4.44103
CXCL13	407.496	3.28953	414.472	9.02503	37.9278	35.0339	185.23
CYBB	49.4937	2452.26	42.8781	36.1046	35.7293	42.0938	40.5159
CYP27A1	5.67854	2286.31	9.01373	7.46175	7.80728	7.15854	6.60911
DHRS2	6.24187	2.83206	201.065	86.265	25.8381	16.6985	157.612
DMRT1	1	1	21.4067	2.09981	1	1	6.73666
DOC2B	4.76983	4.54266	8.33056	6.31698	56.24	9.6729	4.77604
DOK5	50.2101	1.27609	57.7348	53.8917	153.436	78.317	70.213
DPEP2	76.9887	3500.23	106.457	90.1825	77.863	90.7824	119.36
DRD3	1.41421	3.63735	31.028	1.8682	2.04062	2.16147	2.48849
DSC1	2.5369	163.731	2.2706	1.89595	1.80349	1.81946	1.69295
EDAR	10.4406	568.982	3.86071	17.7523	11.5953	12.8012	10.6259
ENPP1	7.75743	5.13086	9.91018	289.219	8.47311	9.65573	9.39969
ERICH3	14.603	1.34687	1.40382	1	1.17153	1	1
FBXO17	3.67656	2.30026	28.6128	5.67854	3.03383	3.64797	10.7279
FCN1	2.57782	134.64	1	1	1	1	1
FCRL4	1.84085	3.59159	7.69906	1.82732	1.45499	1.57962	10.3304
FNBP1L	167.124	65.8644	1871.12	266.597	144.41	165.072	1407.5
FNDC9	51.6202	27.1862	393.474	53.0847	51.7162	54.7768	320.093
FOXA1	3.99674	1	37.0008	3.99674	13.3854	9.61805	19.7777
FPR3	2.00753	366.749	1.95271	2.3201	1.74341	1.79282	1.34142
GAD1	34.8616	2.05017	119.251	275.204	102.674	46.76	49.6971
GASK1B	2.47208	88.4379	2.10889	2.02493	2.58342	2.3201	2.002
GATA3-AS1	9.04821	9.92345	2.24703	79.0609	7.91514	13.0677	9.94275
GBP1P1	368.189	8.74701	44.9046	67.1343	62.9967	76.749	57.8154
GLUD1P2	1	1.91451	1	16.9465	1.35023	1.34307	1.57218
GPA33	18.3456	615.186	25.6338	16.9282	35.1349	25.3121	22.9537
GPNMB	50.5645	8350.97	41.4344	42.1001	57.4937	50.4544	46.4981
GPR161	64.6258	15.8105	764.044	45.4351	57.3813	61.5744	168.692
GRHL3	2.73753	2.59002	137.941	9.65573	5.63321	6.52724	7.59831
GTSCR1	1	73.9367	1.2755	1	1	1	1.25563
GZMB	22804.4	42.1181	11067.7	3304.83	16857.9	10237.9	6346
HELZ2	17146.2	1643.54	4699.8	1701.78	5682.26	6514.06	7248.97
HERC5	9600.38	752.633	5034.25	1171.85	4539.39	1390.67	2352.71
HERC6	6914.84	1137.94	1864.21	1112.4	2148.33	2287.25	2191.76
HMGB1P17	4.06121	1	6.53795	32.1219	11.3522	20.1821	13.5572
HRH1	268.509	10.043	69.3658	318.432	101.194	122.655	85.22
HS3ST2	1.70785	383.321	3.43605	2.18962	1.31441	1.32341	3.46866
HSD11B1	55.4151	4.37801	32.1786	32.0912	154.041	90.9807	79.1492
IFI27	1551.11	10.685	64.4493	53.7954	177.895	81.6552	197.891
IFI44	13472.9	720.076	6221.42	3062.9	6710.84	3981.18	5794.42
IFI44L	33681.1	253.863	15214.7	5174.66	13297.5	7174.17	13657.9
IFI6	22189.5	392.533	5393.21	2150.07	6315.3	2431.52	5543.41
IFIT1	7782.94	144.864	1544.62	310.886	1463.64	787.792	1654.19
IFIT1B	11.6233	1	2.78829	2.07541	1.46949	2.14559	3.42849
IFIT3	31727.9	136.273	7360.42	2931.72	4488.95	5792.47	9394.15
IFNG	4107.87	19.1703	1507.13	727.138	20440.1	4336.86	2558.17
IGHE	3.10878	1	1	29.8422	1.85452	4.13708	1.27825
IL10	932.952	13.1125	96.3933	209.861	112.779	194.699	164.517
IL17F	2625.04	1.61262	128.229	24.5538	1186.6	1470.73	944.315
IL1R2	417.297	4.30614	1399.16	553.108	344.397	490.083	420.234
IL2	14422.9	12.9569	3198.11	332.158	8250.36	8885.39	6939.12
IL21	686.753	1.27606	636.77	315.239	1340.59	395.659	309.89
IL22	139.27	1.28064	52.0768	31.6372	387.751	370.79	60.2587
IL23R	334.539	3.85291	759.082	107.375	876.868	292.608	446.557
IL31	7.70871	1.99214	11.1509	48.1914	7.78611	8.21013	11.7923
IL9	1251.84	1	1260.51	144.258	552.198	870.414	1781.33
INAVA	8.95904	8.59811	92.9823	6.51177	7.63121	6.87348	128.287
INSM1	20.2032	2.35209	9.2487	110.746	49.5928	37.5365	20.8713
ISG15	10956.9	342.771	7606.29	1745.15	4903.94	2049.95	6837.53
JCAD	5.31092	2.49892	7.93374	96.9736	7.06213	9.41986	9.80352
KIF1A	202.374	3.53562	754.425	327.323	252.827	262.649	520.926
KLF2	825.24	10875.4	53.8192	319.602	575.717	564.075	108.609
KRT1	1.90999	41.9889	1.93836	38.0174	2.05967	2.63218	1.62783
KRT72	7.57815	937.069	9.6729	9.73121	4.60691	7.50855	9.24839
KRT73	1.02237	292.724	4.92537	3.12964	4.66357	4.37411	4.51801
KRT73-AS1	2.09981	148.295	1.85447	1.0074	1.01486	1.01486	1.01861
LIF	15043.9	24.5349	15118.5	9406.06	21637.2	9906.54	11214.2
LILRB2	2.14559	119.606	1.79282	2.14559	3.91667	1.68285	1.79071
LILRB4	8.18971	372.259	4.26241	5.74642	7.75894	7.05587	7.6716
LINC00402	20.4239	1062.48	7.9238	10.0514	10.0448	11.2681	11.4074
LINC00484	6.31698	1.56277	4.83237	85.4575	17.1577	11.7363	3.81659
LINC00861	325.482	8049.83	43.5406	119.251	206.824	201.485	60.8172
LINC00967	1	1	1	7.55791	1	1	1
LINC01259	1.68285	133.854	1	1	1.51684	1.90999	1
LINC01524	1.40382	1.01113	1	5.67854	1	1	1.74031
LINC01671	54.6056	2.34978	22.5511	10.8238	19.088	12.6675	21.1448
LINC02020	1	1	13.8314	2.06017	1	1	1
LINC02068	44.051	1.69034	7.33018	3.12964	11.2746	8.87836	6.97461
LINC02341	96.2233	4.01207	201.938	609.096	181.551	194.83	290.288
LINC02528	4.95005	1	41.6241	3.40272	4.3835	3.73799	9.50441
LPL	92.1608	13.2236	223.148	50.4828	132.023	63.3515	259.487
LYZ	13.7653	3526.06	15.335	17.2764	25.4709	33.8296	10.7645
MAFB	2.58572	469.872	2.88577	4.83237	3.97594	3.72302	3.73799
MAOA	233.658	6.33993	57.0436	1605.57	149.02	287.155	124.157
MAOB	1.99889	1	3.04627	17.9228	1.91705	3.14885	3.22019
MMP2	10.5133	58.27	117.09	16.6732	19.646	19.2057	212.485
MMP9	6.96265	960.309	7.18048	8.22181	10.2407	11.9034	10.3953
MPEG1	21.8646	728.238	4.51419	6.33825	6.42968	8.37345	5.18967
MX1	71498	2306.24	18978.3	9959.31	27343.7	12002	21452.5
MX2	11725.9	3728.36	3760.43	2333.7	5396.64	3224.76	4661.8
MYO3B	3.77247	2.22628	3.96294	469.518	11.5294	4.05334	1.27253
NEXN	1126.18	34.1265	115.397	170.546	247.751	343.504	244.826
NGEF	5.10678	2.84353	11.7022	23.64	3.83828	6.21741	5.94311
NIPAL4	483.879	9.22245	858.808	180.587	318.618	363.402	605.029
NKAIN1	11.9215	1	3.55772	1	1.41366	1.89595	3.01751
NOG	5.10678	2016.91	45.6045	31.69	34.5295	15.0301	19.7912
NPPC	8.80287	1	13.8314	7.37902	20.7548	6.23406	5.36169
NRIR	349.203	12.3381	40.2993	17.1142	58.4831	45.6045	59.6766
NSMCE1-DT	19.2057	13.6139	14.6198	61.1372	15.5114	20.0619	21.7079
NT5C1A	1.79282	16.1251	1.34307	3.14885	10.2398	2.76971	2.73753
NTRK3	11.0225	3.40273	112.86	17.9228	18.4383	13.9697	54.9628
OAS1	12064.8	209.026	4138.38	1505.33	4882.88	1890.72	4265.78
OAS3	42883.2	1587.05	6942.12	6514.06	17540	7791.24	11475.8
OASL	8053.96	210.025	3937.79	1066.51	2840.16	1251.1	2554.26
OCM	5.08853	141.812	3.10878	6.62223	3.7545	3.72302	4.06783
OTOF	757.599	20.7181	320.265	406.029	269.59	151.585	356.451
PITX3	1	1	3.39232	14.4582	1.21761	1.99889	2.63112
PLA2G7	2.98875	1528.52	2.98875	2.55888	2.04747	2.11801	1.45404
PLPP3	3.39232	196.404	4.25415	4.38451	3.92799	4.07754	2.89192
PLSCR1	6900.49	263.96	1582.71	1312.4	2677.39	1698.3	2413.92
PPP1R14A	3.55772	1.06678	4.20817	22.6239	2.7457	3.65915	5.14628
PRAL	74.8736	6.74389	14.1803	12.7166	37.708	19.5266	24.7781
PRG4	719.942	70.4547	4345.27	399.746	1359.79	989.462	2309.87
PTGIS	20.7136	1.10567	4.84864	351.928	20.2004	39.722	9.94178
PTHLH	4.11927	1	14.7396	2.68283	12.1441	7.75743	23.3676
RAB7B	2.14559	88.8606	1.81946	2.26083	2.33505	2.00753	1.76809
RSAD2	14422.9	178.747	2812.73	1226.95	3019.75	3261.07	3437.99
RUBCNL	46.5096	22.6195	695.44	37.9964	86.4415	44.0217	59.7175
RUFY4	182.183	7.51715	110.108	15.8274	84.1105	21.1405	140.4
S100A2	18.1814	2.71792	117.09	23.0783	17.6105	19.0173	40.9908
SEMA6B	5.98194	463.459	10.3517	7.69906	5.8112	7.15854	17.3528
SIAH3	12.6675	570.604	17.6365	12.9154	9.04443	13.6841	30.3977
SIGLEC12	9.72407	1.02649	3.96294	40.5949	6.26478	9.28101	6.63039
SLC26A4	270.095	4.62727	29.2835	155.671	58.8399	76.7767	32.4736
SLCO2B1	18.6598	161.492	3.97508	4.71115	5.14993	4.74499	3.96294
SMIM25	1	141.607	1	1	1	1	1
SORD2P	69.9799	5.11814	384.655	67.5246	70.8466	67.9836	253.546
SPAG6	44.4519	2.20996	3.72302	5.23002	11.8499	2.78829	7.50586
SPATS2L	5084.37	155.105	2561.38	939.897	1585.21	1052.34	1975.63
STAB1	7.18048	1503.5	28.9642	9.04821	9.63068	10.8578	27.9285
STEAP1	40.647	1.0037	30.05	17.617	93.5243	31.4396	20.9845
STRIP2	3786.73	27.7524	14300.2	3451.17	5418.61	3781.47	9015.26
SYN1	13.4984	23.7597	160.951	37.4061	27.8835	30.05	61.8344
TDRD6	1.82732	329.032	1.90999	1.23843	1.69295	2.24703	2.49918
TGFBI	17.2379	1383.06	107.174	3.84892	7.10437	6.87348	130.129
THY1	1.65821	1	2.44336	340.199	4.29581	4.09976	4.30242
TINAGL1	1	1.01878	12.5698	1	1	1	9.66097
TLR3	108.268	23.7707	4.99078	4.96929	8.83057	9.06947	11.9854
TLR7	80.5234	9.02961	6.23406	6.91508	16.7177	15.1852	8.96097
TNFRSF8	1405.68	7.14483	5154.63	1908.97	2051.11	1611.16	1011.94
TNFSF10	12930.2	1434.08	2072.01	1543.62	5471.93	3822.96	3289.76
TRIM43CP	1	1	16.9465	1	1	1	2.27338
USP18	4850.98	54.833	1256.06	403.826	1487.26	503.818	1503.94
USP41	23.9339	1	3.53601	2.18962	5.79978	2.16147	3.04449
VIPR1	94.8832	3207.79	132.53	144.665	112.499	134.741	127.505
VSIG1	17.0738	1341.14	15.1791	16.7622	20.3903	22.3245	26.3069
WDR64	39.1112	9.21737	3.57956	3.77247	9.14201	4.25415	7.86798
WNT7A	9.56948	374.672	2.5369	2.70269	5.10173	9.51919	5.00874
XAF1	4624.63	678.019	915.642	667.639	2250.91	1747.29	1825.65
ZBP1	1116.12	455.357	65.1971	50.2835	70.7018	116.12	171.858
