# Supplementary material for: Temporally restricted activation of IFNβ signaling determines response to immune checkpoint therapy
Source: Research Square preprint supplement (doi:10.21203/rs.3.rs-892399/v1), 2021-09-24
Supplement: Supplementary file 4 [file dbfb306f0130b2f700f849ec.xlsx]

## Sheet: Sheet1
Day	B cells memory												B cells naive												Dendritic cells activated												Dendritic cells resting												Eosinophils
0	0.381879	1.266	0.873369	1.45414	0	0.151839	0.43758	1.13	0	0.323181	0.837126	0	0	0	0	0	0.107118	0	0	0	0.184293	0	0	0.714168	0	0	0	0	0	0	0	0	0	0	0	0	0.161526	0.631661	0.06145	0.11498	0.02016	0.043366	0.315594	0.128935	0	0.07085	0.141962	0.330884	0
2	0.21262	3.14289	1.54034	0.48588	1.5132	0.94459	1.61343	10.6445					0	0	0	0	0	0	0	8.87378					0	0	0	0	0	0	0	2.93748					0.157342	0.890674	0.777225	0.370296	1.04137	1.19986	0.241235	0.014397					0.15448
4	2.25678	0.27179	0	3.01536	3.75791	1.68424	0.51599	0.51044					0	0	0.53076	0	0	0	0	0					0	0	0	0	0	0	0	0					0.505826	0.321894	0.316085	0.353678	0.555409	0.442303	0.428721	0.533612					0
6	1.5284	2.12872	2.48914	2.38724	5.91744	5.93164	2.47456	3.26324					0	0	0	0	0	0	0	0					0	0	0	0	0	0	0	0					0.277477	1.03042	0.988678	1.25895	1.50566	0.318061	0.771019	0.327965					0
0	0.499163	0.325315	0	1.01204	0.081597	0	0.354775	0.003177	0.081439	0	0.193173	0.362594	0	0	0.373487	0	0.239739	0.748767	0	0.529742	0	0.66691	0.222561	0	0	0	0	0	0	0	0	0	0	0	0	0	0.712006	0.170562	0.237264	0	0.104037	0.177389	0.171419	0.029007	0.261734	0.765239	0.338297	0.895826	0
2	0.091485	0	1.67058	0	0.931125	0.46462	0.411991	1.95229					0.545772	0.806913	0	1.18076	0	0.052404	0	0					0	0	0	0	0	0	0	0					0.107613	0.148726	0.002343	0	0.3577	0.733543	0	0.119947					0
4	0	3.07918	1.68951	0	1.43533	0.753118	0.554509	0.220999					1.12197	0	0	0.945177	0	0	0	0.206135					0	0	0	0	0	0	0	0					0.27842	0.105436	0.102175	0.234718	0.322485	0	0.019473	0.041272					0
6	1.0262	0	2.22366	1.7282	1.86267	0	1.30531	1.38531					0	0.883532	0	0	0	0.522801	0	0					0	0	0	0	0	0	0	0					0	0.173562	0.083142	0	0.019506	0	0	0.130717					0
0	2.27265	1.25004	2.56631	2.34881	1.74199	2.14641	2.06501	2.38545	2.93899	1.6843	1.71536	0.209957	0	0	0	0	0	0	0	0	0	0	0	0.216949	0	0	0	0	0	0	0	0	0	0	0	0	0.881279	0.876797	0.866918	0.846602	1.0651	1.09427	1.01622	1.24763	0.846176	1.04533	0.636373	0.841451	0
2	0.639247	2.30359	3.07908	1.1029	0.99598	2.09089	3.32113	3.35138					0.12731	0	0	0.190319	0	0	0	0					0.39495	0.802251	0.880316	0.387414	0	0	1.32393	3.29268					1.50841	1.08377	1.06682	0.964241	1.3059	1.01263	1.00223	1.10225					0
4	3.68064	3.09079	1.87596	3.00351	1.6313	0	2.64265	2.56496					0	0	0	0	0	0.782955	0	0					0.639761	0	2.61541	0	1.68572	2.92648	1.30613	2.5942					1.17993	0.563478	0.720428	0.465407	1.24209	1.47485	1.30888	1.46654					0.136903
6	5.00285	1.50995	1.55291	1.43749	1.45094	0.79211	0	3.14636					0	0	0	0	0	0.007505	0.996737	0					0	0	0	0	0	1.49359	0.929913	0.37741					0.660689	0.420451	1.02123	0.83906	1.22965	1.33784	0.757849	1.37109					0
0	1.54143	1.45846	1.95656	0.708832	1.77793	0.213494	1.32596	2.09791	0.008951	2.21689	0.983662	2.10268	0	0	0	0	0	0.36806	0	0	0.325712	0	0	0	0.05841	0	0	0.035473	0	0	0	0	0	0	0	0	1.0137	0.812883	1.00508	0.914103	0.993786	1.00716	1.01638	0.82563	0.812375	0.954144	1.01778	0.839437	0
2	0.936074	1.2727	1.8754	0.709055	1.2766	0.964535	0.135316	1.69449					0	0.018655	0	0	0.243957	0.226761	0	0					0	0.109575	0.305144	0	0	0	0	0					0.950955	0.886874	0.876783	1.31205	0.761413	0.828411	0.950942	0.928804					0
4	3.26814	2.98746	0.046194	0	0.460403	0.252909	0.476253	0.708313					0	0	0.465577	0.230108	0.241304	0.061632	0.358331	0.484448					0	0	0	0.406996	0.868709	0	0.955006	0					1.11633	0.961477	1.1098	1.42505	1.34146	0.924508	1.02677	1.08987					0
6	0.374458	0.315977	0	3.01769	0.547585	0.356067	0.539506	2.43807					0.538565	0.244991	1.02104	0	0.44035	0.585154	0.052872	0					0	0	0	0.862047	0	5.36962	0	0					0.651591	1.46646	0.855307	1.41967	1.00615	2.49313	1.13754	1.13153					0
[truncated: 215 more columns]

## Sheet: Sheet2
	AB1 RS					AB1 NR					Renca RS					Renca NR
Day	0	2	4	6		0	2	4	6		0	2	4	6		0	2	4	6
B cells memory	0.381879	0.21262	2.25678	1.5284		0.499163	0.091485	0	1.0262		2.27265	0.639247	3.68064	5.00285		1.54143	0.936074	3.26814	0.374458
	1.266	3.14289	0.27179	2.12872		0.325315	0	3.07918	0		1.25004	2.30359	3.09079	1.50995		1.45846	1.2727	2.98746	0.315977
	0.873369	1.54034	0	2.48914		0	1.67058	1.68951	2.22366		2.56631	3.07908	1.87596	1.55291		1.95656	1.8754	0.046194	0
	1.45414	0.48588	3.01536	2.38724		1.01204	0	0	1.7282		2.34881	1.1029	3.00351	1.43749		0.708832	0.709055	0	3.01769
	0	1.5132	3.75791	5.91744		0.081597	0.931125	1.43533	1.86267		1.74199	0.99598	1.6313	1.45094		1.77793	1.2766	0.460403	0.547585
	0.151839	0.94459	1.68424	5.93164		0	0.46462	0.753118	0		2.14641	2.09089	0	0.79211		0.213494	0.964535	0.252909	0.356067
	0.43758	1.61343	0.51599	2.47456		0.354775	0.411991	0.554509	1.30531		2.06501	3.32113	2.64265	0		1.32596	0.135316	0.476253	0.539506
	1.13	10.6445	0.51044	3.26324		0.003177	1.95229	0.220999	1.38531		2.38545	3.35138	2.56496	3.14636		2.09791	1.69449	0.708313	2.43807
	0					0.081439					2.93899					0.008951
	0.323181					0					1.6843					2.21689
	0.837126					0.193173					1.71536					0.983662
	0					0.362594					0.209957					2.10268
B cells naive	0	0	0	0		0	0.545772	1.12197	0		0	0.12731	0	0		0	0	0	0.538565
	0	0	0	0		0	0.806913	0	0.883532		0	0	0	0		0	0.018655	0	0.244991
	0	0	0.53076	0		0.373487	0	0	0		0	0	0	0		0	0	0.465577	1.02104
	0	0	0	0		0	1.18076	0.945177	0		0	0.190319	0	0		0	0	0.230108	0
	0.107118	0	0	0		0.239739	0	0	0		0	0	0	0		0	0.243957	0.241304	0.44035
	0	0	0	0		0.748767	0.052404	0	0.522801		0	0	0.782955	0.007505		0.36806	0.226761	0.061632	0.585154
	0	0	0	0		0	0	0	0		0	0	0	0.996737		0	0	0.358331	0.052872
	0	8.87378	0	0		0.529742	0	0.206135	0		0	0	0	0		0	0	0.484448	0
	0.184293					0					0					0.325712
	0					0.66691					0					0
	0					0.222561					0					0
	0.714168					0					0.216949					0
Dendritic cells activated	0	0	0	0		0	0	0	0		0	0.39495	0.639761	0		0.05841	0	0	0
	0	0	0	0		0	0	0	0		0	0.802251	0	0		0	0.109575	0	0
	0	0	0	0		0	0	0	0		0	0.880316	2.61541	0		0	0.305144	0	0
	0	0	0	0		0	0	0	0		0	0.387414	0	0		0.035473	0	0.406996	0.862047
	0	0	0	0		0	0	0	0		0	0	1.68572	0		0	0	0.868709	0
	0	0	0	0		0	0	0	0		0	0	2.92648	1.49359		0	0	0	5.36962
	0	0	0	0		0	0	0	0		0	1.32393	1.30613	0.929913		0	0	0.955006	0
	0	2.93748	0	0		0	0	0	0		0	3.29268	2.5942	0.37741		0	0	0	0
	0					0					0					0
	0					0					0					0
	0					0					0					0
	0					0					0					0
Dendritic cells resting	0.161526	0.157342	0.505826	0.277477		0.712006	0.107613	0.27842	0		0.881279	1.50841	1.17993	0.660689		1.0137	0.950955	1.11633	0.651591
	0.631661	0.890674	0.321894	1.03042		0.170562	0.148726	0.105436	0.173562		0.876797	1.08377	0.563478	0.420451		0.812883	0.886874	0.961477	1.46646
	0.06145	0.777225	0.316085	0.988678		0.237264	0.002343	0.102175	0.083142		0.866918	1.06682	0.720428	1.02123		1.00508	0.876783	1.1098	0.855307
	0.11498	0.370296	0.353678	1.25895		0	0	0.234718	0		0.846602	0.964241	0.465407	0.83906		0.914103	1.31205	1.42505	1.41967
	0.02016	1.04137	0.555409	1.50566		0.104037	0.3577	0.322485	0.019506		1.0651	1.3059	1.24209	1.22965		0.993786	0.761413	1.34146	1.00615
	0.043366	1.19986	0.442303	0.318061		0.177389	0.733543	0	0		1.09427	1.01263	1.47485	1.33784		1.00716	0.828411	0.924508	2.49313
	0.315594	0.241235	0.428721	0.771019		0.171419	0	0.019473	0		1.01622	1.00223	1.30888	0.757849		1.01638	0.950942	1.02677	1.13754
	0.128935	0.014397	0.533612	0.327965		0.029007	0.119947	0.041272	0.130717		1.24763	1.10225	1.46654	1.37109		0.82563	0.928804	1.08987	1.13153
	0					0.261734					0.846176					0.812375
	0.07085					0.765239					1.04533					0.954144
	0.141962					0.338297					0.636373					1.01778
	0.330884					0.895826					0.841451					0.839437
Eosinophils	0	0.15448	0	0		0	0	0	0		0	0	0.136903	0		0	0	0	0
	0	0	0	0		0	0	0	0		0	0	0	0		0	0	0	0
	0	0	0	0		0	0	0	0		0	0	0	0		0	0	0	0
	0	0	0	0		0	0	0	0		0	0	0	0		0	0	0	0
	0	0	0	0		0	0	0.404472	0		0	0	0	0		0	0	0	0
	0	0	0	0		0	0	0	0		0	0	0	0		0	0	0	0
	0	0	0	0		0	0	0.132718	0		0	0	0	0		0	0	0	0
	0	0	0	0		0	0	0	0		0.48655	0	0	0		0	0.014996	0	0
	0					0					0					0
	0					0					0.104405					0
	0					0					0					0
	0					0					0					0
Macrophages M0	4.78725	5.41873	2.52766	4.39675		3.83019	6.68799	1.24599	2.65496		0	1.04812	0.368913	0		0	0	0	1.31059
	5.72265	2.56147	2.85826	1.6094		6.86881	3.1963	1.81961	0.142614		0	0.704984	1.75671	6.80969		0	0	0	1.91457
	4.27343	2.23279	3.85552	2.60026		11.4006	2.26331	3.28616	2.52127		0	0	2.65183	0		0	0	0	1.19188
	5.87182	2.75984	2.80212	3.21073		8.05232	4.19107	1.92895	3.10468		0	0	1.12196	0		0	0.486504	0	0.978956
	3.99631	3.90138	2.95627	2.15291		5.63307	2.78415	3.1108	2.57029		0	0.611482	0.100236	1.92751		0	0	0.117268	0.395655
	6.86167	5.71251	4.16144	1.52638		8.47323	2.64169	3.27449	2.07458		0	0	0.719509	1.90322		0	0	0	0
	5.93514	2.33662	4.31243	2.44806		13.3953	3.56235	3.26407	2.65158		0	0.596986	0.414746	0.13039		0	0	0	0.816653
	4.99119	0	3.64415	2.76612		9.38099	3.32991	3.64521	1.35576		0	3.16754	1.7367	0		0	0	0.035994	0
	4.44045					7.44628					0					0
	5.34037					7.85938					0					0
	5.75412					5.08865					0.343649					0
	2.89509					2.02068					0					0
Macrophages M1	11.6611	8.02396	1.81807	1.53105		2.92246	15.8285	4.85798	6.161		1.66349	14.1599	5.20256	1.40096		1.11274	2.09243	6.32115	3.30419
	10.3546	3.9085	0.2	0.08635		5.4001	4.14359	3.32462	4.44485		2.22169	10.1219	7.27729	2.15034		1.47767	3.99343	3.89754	9.84634
	13.3287	2.1	0.51654	0.97534		8.9776	2.93757	4.68582	3.68952		1.91103	13.0109	5.09542	1.75716		3.78781	6.4068	5.58727	2.81491
	8.64986	0.72919	0.49128	0.44355		5.87087	11.2071	4.25702	3.35349		1.52066	6.36066	6.81361	2.65226		1.0136	5.38707	2.50185	10.0499
	9.48053	2.25598	0.36234	0.4		3.80285	9.24058	4.80173	3.12943		2.22126	8.72577	4.82735	6.45746		1.73065	5.07457	8.08939	7.48902
	16.2149	3.75581	1.80634	0.2891		6.22272	3.64383	4.13917	8.57941		2.32799	9.18248	10.0396	5.93239		0.855757	8.08316	2.15451	1.53912
	8.10787	1.20735	1.96017	1.99518		5.40239	3.34902	16.0471	3.66275		2.36082	9.71981	5.71891	1.38998		1.5758	0.788417	6.15977	8.32122
	7.00842	0	0	0		7.02053	4.23981	6.27633	3.13878		3.49934	9.43343	2.56974	2.63645		1.63186	2.70067	6.47862	3.68055
	14.4457					5.47387					1.5903					1.28356
	19.7679					5.23614					2.5829					1.07272
	13.4458					1.37402					2.72784					1.58538
	7.88214					1.46585					2.45501					1.39513
Macrophages M2	12.7999	14.99	4.61231	3.70674		10.9012	7.94173	2.18043	13.4117		6.82213	1	1.87432	6.31221		7.09618	6.95276	3.75575	9.3231
	10.2013	5.40879	9.06126	3.54146		12.9662	14.4509	8.47072	10.2266		4.58084	1.90773	1.08048	12.0543		5.23225	6.68721	4.45024	3.20163
	11.7113	9.22113	7.30243	5.16656		8.4421	9.66452	12.4002	8.33701		6.01832	4.76421	6.162	5.56116		4.12849	4.99394	3.446	1.43629
	16.13	9.17527	5.59663	3.0162		11.5587	16.0743	3.37072	10.2299		7.32669	4.75028	2.63058	2.61242		7.98236	4	2.50491	2.11523
	15.5318	6.85479	6.41924	2.71868		8.66442	13.0479	8.59095	8.14287		3.97618	0.682858	4.1967	0		4.57224	11.0597	1.52383	2.66321
	0.995	7.78517	1.93644	5.3496		9.03086	9.16283	12.7785	11.7995		4.68571	2.67868	0	5.39048		5.78109	6.11153	6.83742	0.872929
	13.6364	9.39768	4.80969	4.04703		9.37949	11.7218	9.20525	11.1026		4.49771	4.43356	3.43882	4.6906		6.14044	7.87965	4.50273	0
	18.6266	5.44666	10.1593	4.98412		14.0045	17.5555	15.1926	7.86934		3.56798	8.85665	4.20829	6.00784		6.25867	5.80567	3.64782	6.31407
	12.4913					10.1496					6.75328					6.90582
	4.68122					8.27734					6.0268					6.16691
	11.0945					9.1967					6.74933					6.88221
	3.84126					10.0089					6.96587					5.6637
Mast cells activated	0	0	0	0		1.18163	3.53717	0	2.24089		0	0	0	0		0	0	0	0
	0	0.78948	0	0		0	0	0	0		0	0	0	0		0	0	0	0
	0	0	0	0		0	0	0	0		0	0	0	0		0	0	0	0
	0	0	0	0		0.962447	0.952177	0	0		0	0	0	0		0.177375	0	0	0
	0	0	0	2.34639		1.49334	0	0	0		0	0	0	0		0	0	0	0
	0	0	0	0		0	0	0	0		0	0	0	0		0.10068	0	0	0
	0	0	0	0		0	0	0	0		0	0	0	0		0	0.121295	0	0
	0	0	0	0		0.13601	0	0.842844	0		0	0	0	0		0	0	0	0
	0.837342					0					0					0
	0					0					0					0
	0					1.3136					0					0
	0.478701					1.09722					0					0
Mast cells resting	2.39114	1.85642	2.97567	3.35983		0	0	2.76071	0		1.13108	1.4804	2.45627	2.61178		0.995543	1.04633	1.90776	2.90873
	1.62092	0	3.17745	0.91259		0.955099	1.51226	2.03746	1.85369		0.67493	1.22991	3.19388	1.05536		0.703861	1.45502	1.16845	1.57969
	1.17069	3.36822	3.06907	1.4839		0.013844	2.47257	1.49917	1.87739		0	1.40595	3.56388	2.47772		0.83064	1.5211	1.47282	2.7677
	2.44352	2.43288	2.85802	0.82763		0	0	3.1336	1.34376		0.742124	1.40194	2.01629	2.87575		0	0.212058	1.74873	1.56195
	2.82745	3.01744	2.51541	0		0	2.20167	1.8356	1.92611		0.831176	1.38118	4.24247	1.5331		0.723676	2.6393	2.01098	1.42128
	0.857799	1.10314	2.1777	2.6782		0.829281	2.17827	1.89342	1.32774		0	1.43948	1.73346	1.54431		0	1.45297	1.32466	0.550603
	3.00503	2.69174	3.28026	2.72649		1.36656	1.01355	1.72868	2.13913		1.17803	1.57908	3.29326	3.74327		0	0	1.65194	0.459562
	2.26301	1.05914	3.42157	1.99365		0.632437	1.7844	0.697865	2.52851		0.800206	1.06591	2.0175	1.12051		0.742305	1.02126	2.44105	1.27528
	0.876663					0.664253					0.472202					0.666453
	1.88434					0.995561					0.606872					0.096774
	1.60197					1.47629					0.387194					0.309626
	2.30658					0					1.80507					0.213606
Monocytes	0	1.95603	10.8395	12.8797		0	5.21784	15.2103	4.64117		4.32258	14.9053	15.0802	9.7876		2.66237	3.04717	9.73215	9.44915
	0	5.68388	12.0619	6.91935		0	3.00273	6.95225	8.34821		4.86128	10.6078	21.7733	5.52568		4.52176	5.80518	5.65893	9.54009
	0	9.8763	12.5838	6.81192		0	7.58752	6.01344	7.27466		5.00146	6.94062	7.07596	8.65323		5.6008	8.7146	8.71576	15.4473
	1.85042	9.20283	10.8605	6.80009		0	0.001432	13.684	6.0821		4.63811	7.63669	21.1876	18.0121		3.73009	14.3884	7.67998	6.25062
	5.0823	5.34388	16.7373	4.22941		0	0	9.79045	3.62695		5.35909	13.0205	7.93102	18.903		3.76786	10.1223	8.52337	8.27316
	0	4.19483	14.3857	11.2286		0	5.25046	4.93553	0		5.27255	11.0307	9.99622	5.04813		3.52116	7.96504	3.0581	8.20572
	2.70592	8.27155	15.0915	10.2862		0	8.94394	0	5.99659		5.40347	8.12737	9.22306	14.6911		4.69772	3.672	8.51485	22.9321
	0.415107	0	10.7716	12.1812		0	1.87676	2.87217	7.78675		6.10402	3.20531	8.72111	4.41703		4.56939	5.92846	10.6132	3.23024
	1.07261					0					4.93022					5.47133
	0					0					5.54685					3.2227
	0					1.30624					8.54196					3.90376
	0.946449					0					7.40192					4.55281
Neutrophils	0.009522	0	0	0		0.313048	0	0	0		0	0	0	0		0	0	0	0
	0.400248	0	0	0		0.270591	0	0	0		0	0	0	0		0	0	0	0
	0.330489	0	0	0		0.159106	0	0	0		0	0	0	0		0	0	0	0
	0	0	0	0		0	0	0	0		0	0	0	0		0	0	0	0
	0	0	0	0		0	0	0	0		0	0	0	0		0	0	0	0
	0	0	0	0		0.541796	0	0	0		0	0	0	0		0	0	0	0
	0	0	0	0		0.116939	0	0	0		0	0	0	0		0	0	0	0
	0	0.1741	0	0		0.629376	0	0	0		0	0	0	0		0	0	0	0
	0.274041					0.297015					0					0
	0.362232					0.506408					0					0
	0					0					0					0
	0					0.016912					0					0
NK cells activated	4.11977	3.63674	3.27091	0		2.45344	1.61066	0.574218	3.26854		2	5.51317	5.62773	4.08267		0.061742	0	1.33002	1.6077
	5.44258	1.9211	4.39218	2.841		0.718131	1.98718	1.12642	0		2	3.84354	4.95319	3.4997		0.070211	0.07822	0.269912	2.41448
	4.20692	1.21646	2.0566	3.21922		1.00667	1.37226	2.37159	0		2	3.10129	4.3727	4.09606		0.901119	1.17106	1.52839	2.83445
	6.0863	2.24716	1.57577	1.44365		2.37011	2.44261	0.270525	1.44563		2	2.69752	3.64483	3.99812		0	0.567856	0	2.53818
	5.25788	1.41358	3.72381	2.97293		1.67704	1.62921	1.95737	0.275652		2.40698	3.71071	6.05637	3.45559		0	2.25862	0.668931	1.75522
	4.21187	2.09674	2.03654	2.17808		0.976416	1.98285	1.76317	1.75716		2	2.5369	6.14934	3.49664		0	0.985697	0.176747	0
	6.51327	2.09594	2.96289	1.72283		2.2908	1.30771	1.90794	2.19406		2.84151	3.38839	4.98293	5.12202		0	0	1.4894	1.96559
	5.65661	1.5123	5.48894	3.62919		1.3117	3.55057	5.62807	0.795994		2	5.93142	2.72496	3.24329		0	0.356572	0.738145	0
	6.58103					0.931572					2					0
	5.56217					1.29156					2					0
	5.75059					2.47284					2					0
	2.16816					2.12603					1.46685					0
NK cells resting	0	0	1.44878	3.28793		0	0	2.38203	0		0.202337	0.496631	0	1.90215		0.177054	0.29706	0.45052	2.46372
	0	0.62901	1.62835	0.61312		0	0.342595	1.5333	2.45003		0.367064	0	0.595506	1.44597		0.153899	0.789903	0.509839	0
	0	2.20341	2.10398	0.45363		0	1.57397	0.357431	2.48628		0.817153	1.51641	0.303238	0.200077		0	0.708776	0.034237	0.488525
	0	1.23213	1.3514	0.32947		0	0	3.32192	0.627271		0.89392	1.04929	0.45243	1.68539		1.1807	0.994018	1.02313	0
	0	1.47712	1.55998	0		0	0.488908	0.546727	2.06665		0	0.463265	0	1.01045		0.372705	0.353923	3.32888	0.383379
	0	0.05819	1.1926	0.79805		0.039877	1.12452	0.925142	0		0.69169	1.17016	0.023337	0		1.27692	1.1517	0.212639	2.09472
	0	1.96917	1.28072	2.03237		0	1.81546	0.360092	0.012221		0.156615	1.60478	0.015083	0.952762		2.00065	0.313517	0.878552	0.242682
	0	0	0.56977	1.98773		0	0.307817	0	2.26581		1.65566	0	0.754732	1.12576		0.314104	0	1.81336	0.474898
	0					0					1.17599					0.100205
	0					0					0.393763					0.894766
	0					0					0.998652					1.31997
	0					0					0					1.18864
Plasma cells	0.137448	0.07853	0.927	2.96929		0.141801	0.005554	0	0.395057		0.428536	0	0.783143	1.09336		0	0	0.335034	0.195956
	0.355635	10.5206	0.01985	3.85755		0.03586	0	1.52293	0		0.131734	0	1.42028	0.662019		0.151154	0	0.237331	0
	0.073737	0.47299	0	3.76365		0	0.972465	2.01249	2.54718		0.518331	0	0.036773	0		0.449932	0	0	0
	0.269307	0.3257	0.24047	4.0745		0.300939	0	0	2.61436		0.363427	0	1.39143	0		0	0.214543	0	0
	0	0.2706	3.48384	3.79914		0.06479	0.264501	2.77479	2.22026		0.628476	0.29343	0.370096	0.61754		0.206633	0.045464	0	0
	0.060156	0.37436	2.80867	4.53776		0.046082	0	0.262007	0.401902		0.496147	0.114886	0	0		0	0	0	0
	0.083025	0.56794	0.25484	2.00958		0	0.212651	0.214277	0.720766		0.3784	0	0.327302	0		0.097283	0.038699	0	0.34443
	0.369477	14.5092	0	3.87141		0	0.565855	0	0.90747		0.480579	0	0.659618	0.152244		0.201804	0.466189	0	0.182966
	0.014472					0.001228					0.508295					0
	0.130428					0					0.367824					0.30908
	0.221022					0					0.179483					0.01969
	0					0.009917					0					0.342612
T cells CD4 memory activated	0	0	0	0.71119		0	0	0.202185	0		0	0	2.25077	5.02825		0	0	0	5.23567
	0.796095	0	0	0		0	0	0	0		0	0	0	1.76569		0	0	0	0
	0	0	0	0		0	0	0	0		0	0	0	4.08824		0	0	0	1.51814
	0	0	2.26071	0		0.763312	0	0	0		0.395068	0	0	6.57725		0	0	0	0
	0	0	0	0		0	0	0	0		0	0	2.53372	0.103229		0	0	0	0
	0	0	0.55503	2.77746		0	0	0	0		0	0	0	0		0	0	0	0.409406
	0	0	0	0		0	0	0	0.128761		0	0	0.503446	5.96885		0.029172	0	0	0
	0	4.76473	0	0		0	0	0	0		0	0.319847	2.14678	0		0	0	0.112498	0
	0					0					0.780797					0
	0					0					0					0.067181
	0					0					0.95111					0.215889
	0					0					0.131393					0.266145
T cells CD4 memory resting	1.50267	0	0	0		1.26091	2.33459	0	0		0	0	0	0		0	0	0	0
	1.06497	0	0	0		0.613332	1.19878	0	0.293093		0	0	0	0		0	0	0	0
	0.209565	0.26375	0	0		0.108283	0	0	1.93554		0	0	0	0		0.289982	0	0	0
	1.69372	0.41422	0	0		0.321328	0	0	0		0	0.434899	0	0		0	0	0	0.127993
	0	0.82991	0.00538	0		1.01811	0.366958	0	0.710431		0	0	0	0		0	0	0.071638	0.971064
	1.32023	0.50466	0	0		2.16447	1.71943	0.001071	0.443123		0	2.1539	0.130851	0.536558		0	1.07334	0	0
	1.92691	0	0	0		1.15816	1.29256	0.346654	0		0	0	0	0		0	0.241869	1.04245	0
	1.86966	3.03717	3.04807	0		1.33783	0	2.83237	0.383861		0.446561	0	0	0		0	0	1.3801	0
	1.00628					1.54374					0					0
	1.34356					1.18368					0					0
	2.03295					3.93472					0					0.414808
	2.31401					2.26687					0					0
T cells CD4 naive	0	0	0	0		0	0	0	0		0	0	0	0		0	0	0	0
	0	0	0	0		0	0	0	0		0	0	0	0		0	0	0	0
	0	0	0	0		0	0	0	0		0	0	0	0		0	0	0	0
	0	0	0	0		0.015241	0	0	0		0	0	0	0		0	0.609097	0	0
	0	0	0	0		0	0	0	0		0	0	0	0		0	0	0	0
	0	0	0	0		0	0	0	0		0	0	0	0		0	0	0	0
	0	0	0	0		0	0	0	0		0	0	0	0		0	0	0	0
	0	0	0	0		0	0	0	0		0	0	0	0		0	0	0	0
	0					0					0					0
	0					0					0					0
	0					0					0					0
	0					0					0					0
T cells CD8	2.06499	5.01212	14.6093	14.8395		1.87992	1.8491	5.91067	17.4916		3.88729	11.2482	25.92	27.8626		4.51002	4.44983	10.2895	30.9588
	3.43165	8.463	13.683	18.6485		1.32867	4.9622	15.3223	14.3499		4.37756	7.73872	16.1637	19.6802		5.13464	6.99304	9.07617	13.5278
	4.16782	10.3502	18.4094	18.6449		1.63577	6.65151	11.8717	13.7801		3.7989	11.5814	12.5857	28.7681		5.95394	7.65125	11.0592	22.8031
	5.22578	14.0168	14.0404	18.5727		1.70414	2.80791	12.8651	10.2657		6.33067	3.99261	12.5922	25.7133		3.78477	7.52754	8.19231	16.8562
	6.01396	13.3846	5.67484	13.7946		1.94314	2.6713	7.60628	9.2805		6.29796	10.5015	22.0827	13.7838		5.95422	10.4762	11.7392	6.29431
	2.74653	9.61434	17.0601	15.4678		1.44929	6.94098	9.82308	2.9356		6.61983	6.4988	13.8972	21.3632		4.09528	7.27527	15.2567	9.43628
	4.52125	12.1032	16.6349	14.8253		2.97648	6.40345	3.21251	7.69002		6.99858	8.5756	18.0083	24.9195		5.05295	3.20115	9.29344	12.5504
	4.40411	4.24088	19.3916	21.0964		1.71589	6.15052	3.47376	13.6031		6.24354	12.758	15.7545	19.574		4.89413	4.3493	11.3446	2.60237
	4.6725					1					4.68132					4.97591
	3.33709					1.70135					4.57198					4.16411
	3.78264					1.87005					6.21822					7.08775
	1.18266					1.58554					9.21724					5.98534
T cells follicular helper	0.538884	2.88698	3.21698	3.93093		0.48921	1.86533	3.15126	3.05494		1.13287	4.81977	6.74734	3.74331		1.81614	1.70057	1.34031	2.29513
	0.696528	1.82742	3.33676	2.76947		0.64189	1.96324	2.74312	3.74729		0.680742	3.78633	6.1397	4.08986		1.17864	2.00762	2.11212	1.72073
	1.54276	0	2.13433	1.87899		0.364081	1.25985	2.22613	1.45736		0.270864	1.76342	1.44637	3.06935		3.0396	2.05316	1.34033	3.16597
	2.57574	0.71005	1.8928	2.88667		0	2.60693	2.5392	1.97082		0.253722	1.54425	3.51943	5.00463		0.434593	0.615482	2.56514	2.17225
	0.630288	1.26194	3.98604	2.69807		0.647688	1.35368	3.41807	1.42631		1.59387	2.73956	2.3116	3.60864		1.05085	2.51315	1.22931	2.27342
	1.93436	1.5713	5.03386	3.62569		1.78296	1.52893	1.35118	1.01985		1.207	0.816931	3.08829	1.51338		0.242475	1.07385	1.75307	3.53554
	1.56905	1.85452	2.82164	3.27254		1.47474	0	2.15073	2.52355		0.48679	2.27857	1.70805	6.46922		0.681757	0.755581	1.66291	2.78839
	2.06237	2.90567	3.09339	2.85543		1.26349	1.72658	2.09281	1.1045		1.69137	7.09097	2.35986	1.84859		1.0481	1.85436	0.695447	2.21389
	1.05046					1.16735					0.086428					0.349215
	1.20485					0.627891					1.14036					0.342847
	0.385704					0.743202					1.14098					0.168746
	0.300294					0.404167					0.644731					0.083625
T cells gamma delta	0	0	0	0		0	0.079459	0	0		0	0	0	0		0	0	0	0
	0	0	0	0		0	0	0	0		0	0	0	0		0	0	0	0
	0	0	0	0		0	0	0	0		0	0	0	0		0	0	0	0
	0	0	0	0		0	0	0	0		0	0	0	0		0	0	0	0
	0	0	0	0		0	0	0	0		0	0	0	0		0	0	0	0
	0	0	0	0		0	0	0	0		0	0	0	0		0	0	0	0
	0	0	0	0		0	0	0	0		0	0	0	0		0	0	0	0
	0	0	0	0		0	0	0	0		0	0	0	0		0	0	0	0
	0					0					0					0
	0					0					0					0
	0					0					0					0
	0					0					0					0
T cells regulatory (Tregs)	0.351486	0	2.71682	1.47562		0	1.19376	2.44577	2.24597		1.7835	0.058499	1.78433	0.921328		0.825558	0.474043	0.507216	0.889296
	0.230184	0.88074	2.38241	2.62781		0	0.741525	3.13078	3.04901		1.63188	0	1.32789	0.754748		1.05416	0.251568	1.1653	1.14003
	0.617472	2.91462	3.24744	3.23289		0.616552	1.14861	1.75906	2.14618		1.57608	0.425368	2.11241	0.291415		1.06343	0.555455	0.48942	0.64862
	1.03694	3.7624	0.21332	5.20321		0	0.036411	0.862263	1.34876		0.85802	0.023603	0.884205	0.931235		1.00191	0.374634	0.578402	1.06537
	1.65914	2.05242	1.57747	3.98073		0.484525	0	0.763539	0.627574		1.96448	0.616108	1.76861	0.969107		1.61324	0	0.525442	0.145378
	0	1.16644	3.21156	1.4706		0.196574	1.21862	1.37162	0.3495		1.49819	0.176465	0.586176	1.73918		1.12851	0.175809	0.177239	0.10558
	2.18333	1.67197	4.36602	2.07756		0	0	0	0		0.601059	0.275692	0.238536	0.954131		0.447245	0.75824	0.72335	0.6301
	0.370287	1.50907	3.40137	3.64516		1.35142	0.801015	0	4.06862		2.48069	0.099144	2.24906	2.23077		1.09022	0.983884	0.090958	1.21898
	0.460791					0					0.781216					1.77986
	1.4414					0.892898					1.93481					0.086575
	0.15534					1.63899					2.34708					0.500473
	1.35724					0					1.60265					0.764622
